# Supplementary material for: Arbuscular mycorrhizal fungi enhance drought resistance in Bombax ceiba by regulating SOD family genes
Source: PeerJ. 2024 Aug 7;12:e17849. doi: 10.7717/peerj.17849 (PMC11316461; doi:10.7717/peerj.17849)
Supplement: Supplemental Information 1 [file peerj-12-17849-s001.xls]

## Sheet: Sheet1
ITEM TO CHECK	IMPORTANCE	CHECKLIST
EXPERIMENTAL DESIGN
Definition of experimental and control groups	E	√:line123-129
Number within each group	E	√:line127-129
Assay carried out by core lab or investigator's lab?	D	NA
Acknowledgement of authors' contributions	D	NA
SAMPLE
Description	E	√:line167-172
Volume/mass of sample processed	D	√:line244-245 and SM
Microdissection or macrodissection	E	macrodissection
Processing procedure	E	√:Line167-172
If frozen - how and how quickly?	E	NA
If fixed - with what, how quickly?	E	NA
Sample storage conditions and duration (especially for FFPE samples)	E	SM: sample part
NUCLEIC ACID EXTRACTION
Procedure and/or instrumentation	E	√:line244-247
Name of kit and details of any modifications	E	√:line244-246
Source of additional reagents used	D	NA
Details of DNase or RNAse treatment	E	√,line245,Dnase
Contamination assessment (DNA or RNA)	E	√,line 245-246 and SM
Nucleic acid quantification	E	√,line246-247
Instrument and method	E	√,245-247
Purity (A260/A280)	D	SM
Yield	D	SM
RNA integrity method/instrument	E	√,line246-247
RIN/RQI or Cq of 3' and 5' transcripts	E	SM
Electrophoresis traces	D	∅
Inhibition testing (Cq dilutions, spike or other)	E	∅
REVERSE TRANSCRIPTION
Complete reaction conditions	E	SM
Amount of RNA and reaction volume	E	SM
Priming oligonucleotide (if using GSP) and concentration	E	SM
Reverse transcriptase and concentration	E	SM
Temperature and time	E	SM
Manufacturer of reagents and catalogue numbers	D	SM
Cqs with and without RT	D*	OK
Storage conditions of cDNA	D	SM
qPCR TARGET INFORMATION
If multiplex, efficiency and LOD of each assay.	E	∅
Sequence accession number	E	√,Table S1
Location of amplicon	D	∅
Amplicon length	E	√,Table S1
In silico specificity screen (BLAST, etc)	E	∅
Pseudogenes, retropseudogenes or other homologs?	D	∅
Sequence alignment	D	∅
Secondary structure analysis of amplicon	D	∅
Location of each primer by exon or intron (if applicable)	E	NA
What splice variants are targeted?	E	NA
qPCR OLIGONUCLEOTIDES
Primer sequences	E	√,Table S1
RTPrimerDB Identification Number	D	NA
Probe sequences	D**	NA
Location and identity of any modifications	E	NA
Manufacturer of oligonucleotides	D	√,line 248-249
Purification method	D	∅
qPCR PROTOCOL
Complete reaction conditions	E	SM
Reaction volume and amount of cDNA/DNA	E	√,line 245 and SM
Primer, (probe), Mg++ and dNTP concentrations	E	SM
Polymerase identity and concentration	E	SM
Buffer/kit identity and manufacturer	E	√,line255 and SM
Exact chemical constitution of the buffer	D	∅
Additives (SYBR Green I, DMSO, etc.)	E	√, line 252
Manufacturer of plates/tubes and catalog number	D	∅
Complete thermocycling parameters	E	√,line256-258
Reaction setup (manual/robotic)	D	√, robotic
Manufacturer of qPCR instrument	E	√,line 251
qPCR VALIDATION
Evidence of optimisation (from gradients)	D	OK
Specificity (gel, sequence, melt, or digest)	E	SM
For SYBR Green I, Cq of the NTC	E	∅
Standard curves with slope and y-intercept	E	SM
PCR efficiency calculated from slope	E	SM
Confidence interval for PCR efficiency or standard error	D	∅
r2 of standard curve	E	SM
Linear dynamic range	E	∅
Cq variation at lower limit	E	NA
Confidence intervals throughout range	D	NA
Evidence for limit of detection	E	NA
If multiplex, efficiency and LOD of each assay.	E	NA
DATA ANALYSIS
qPCR analysis program (source, version)	E	SM
Cq method determination	E	SM
Outlier identification and disposition	E	SM
Results of NTCs	E	No specific peaks appear in NTC
Justification of number and choice of reference genes	E	√,line 253
Description of normalisation method	E	√,line 260-261
Number and concordance of biological replicates	D	√,line 258-260
Number and stage (RT or qPCR) of technical replicates	E	√,line 259
Repeatability (intra-assay variation)	E	∅
Reproducibility (inter-assay variation, %CV)	D	∅
Power analysis	D	∅
Statistical methods for result significance	E	√, Figure 8 note
Software (source, version)	E	IBM SPSS, Statistics 19
Cq or raw data submission using RDML	D	∅
Table 1. MIQE checklist for authors, reviewers and editors. All essential information (E) must be submitted with the manuscript. Desirable
information (D) should be submitted if available. If using primers obtained from RTPrimerDB, information on qPCR target, oligonucleotides,
protocols and validation is available from that source.
*: Assessing the absence of DNA using a no RT assay is essential when first extracting RNA. Once the sample has been validated as
RDNA-free, inclusion of a no-RT control is desirable, but no longer essential.
**: Disclosure of the probe sequence is highly desirable and strongly encouraged. However, since not all commercial pre-designed assay
vendors provide this information, it cannot be an essential requirement. Use of such assays is advised against.
√： Information is included in the text.
OK: Test was performed but evidence is missing.
∅ Information is not available.
NA: Not applicable
SM: Information is provided in Supplementary Materials
Sample
Sample storage conditions and duration: 3 weeks at -80 °C
Nucleic acid extraction: 100mg sample powder was used for RNA extraction.
purity （260/280）and Yeild(ng/μL)	purity （260/280）	Yeild(ng/μL)
ID	1.96	120.3
FSWW1	1.84	110.6
FSWW2	1.98	138.4
FSWW3	2.02	126.1
FSWW4	1.87	119.7
FSDS1	2.06	106.4
FSDS2	1.79	114.6
FSDS3	1.96	98.6
FSDS4	1.95	88.7
NSWW1	2.04	94.2
NSWW2	1.98	87.9
NSWW3	1.76	75.6
NSWW4	1.87	92
NSDS1	1.97	67.2
NSDS2	1.92	82.3
NSDS3	1.85	76.2
NSDS4	1.88	92.1
FRWW1	1.76	131.2
FRWW2	1.87	127.6
FRWW3	1.97	122.3
FRWW4	1.92	115.9
FRDS1	2.1	114.6
FRDS2	2.01	98.6
FRDS3	1.87	88.7
FRDS4	1.95	104.2
NRWW1	1.87	78.7
NRWW2	1.77	64.2
NRWW3	1.92	87.9
NRWW4	1.85	75.6
NRDS1	1.95	62
NRDS2	2.04	67.2
NRDS3	1.98	82.3
NRDS4	1.76	76.2
Reverse transcription
Complete reaction conditions: Reactions were prepared on ice
Amount of RNA and reaction volume: Amount of RNA was 434 ng in 20 µL reaction
RT primer Mix: Priming oligonucleotide (if using GSP) and concentration: Oligo(dT)20 (2.5 µM), random hexamers (6 mers)
Reverse transcriptase and concentration: PrimeScript RT Enzyme Mix I
Temperature and time: 15 min @ 37 °C + 5 s @ 85 °C + ice
Manufacturer of reagents and catalog numbers: Takara (Code No. RR047A)
Storage conditions of cDNA: -20 °C
qPCR protocol
Complete reaction conditions: Reactions were prepared on ice.
Reaction volume and amount of cDNA/DNA: 10 µL TB Green Premix Ex Taq Ⅱ(Tli RNaseH Plus)(2×), Forward Primer 1 µL, Reverse Primer 1 µL, 4 µL 10x diluted cDNA, 4 µL DEPC water
Primer, (probe), Mg2+, and dNTP concentrations: Primers at 10 µM, ∅
Polymerase identity and concentration: Platinum® Taq DNA Polymerase, ∅
Buffer/kit identity and manufacturer: TB Green®Premix Ex Taq™ II (Tli RNaseH Plus) (Code No. RR820A/B)(Takara)
Manufacturer of plates/tubes and catalog number: LightCycler® 480 Multiwell plate 96.
Complete thermocycling parameters: 3 min @ 95 °C + (20 sec @ 95 °C + 20 sec @ 56 °C+20 sec @ 72 °C) x40
Reaction setup (manual/robotic): Using Roche LightCycle® 96 machine (Roche, Germany)
Manufacturer of qPCR instrument: Roche, lightCycler® 96 Roche
qPCR validation
Specificity (gel, sequence, melt, or digest): Melt curves from 60-95 °C on lightCycler ® 96 Roche
PCR efficiency calculated from slope
Genes	BcCSD1a	BcCSD1b	BcCSD1c	BcCSD2a	BcCSD2b	BcCSD3	BcCSDc	BcFSD1	BcFSD2	BcFSD3	BcMSD1a	BcMSD1b	BcMSD2
Efficiency	1.87	1.89	1.97	1.89	1.91	1.94	1.9	1.78	1.96	1.69	1.92	1.94	1.76
Data analysis
qPCR analysis program (source, version): ClightCycler® 96 system
Method of Cq determination: Manual positioning above background signal
