# Supplementary material for: Arbuscular mycorrhizal fungi enhance drought resistance in Bombax ceiba by regulating SOD family genes
Source: PeerJ. 2024 Aug 7;12:e17849. doi: 10.7717/peerj.17849 (PMC11316461; doi:10.7717/peerj.17849)
Supplement: Supplemental Information 2 [file peerj-12-17849-s002.xlsx]

## Sheet: colonization rate
	colonization rate
	Hypha	Arbuscule	Vesicle	Spore
well watered	0.75792	0.478778	0.051777	0.421569
well watered	0.730182	0.489381	0.0544673	0.490363
well watered	0.729458	0.539216	0.0592105	0.513592
well watered	0.758587	0.512402	0.0606838	0.507599
drought stress	0.473504	0.454174	0.217589	0.360016
drought stress	0.504206	0.464286	0.282768	0.395631
drought stress	0.577098	0.395878	0.27516	0.380856
drought stress	0.596894	0.333333	0.226984	0.373077

## Sheet: Radical and height
	AMF	water	Radical（mm）	Height（cm）
	AMF	well watered	4.72	20.3
	AMF	well watered	4.87	20
	AMF	well watered	4.61	19.8
	AMF	well watered	4.33	19
	AMF	drought stress	4.34	18.9
	AMF	drought stress	4.45	18.2
	AMF	drought stress	3.81	17.5
	AMF	drought stress	3.92	17.3
	NMF	well watered	3.51	14.2
	NMF	well watered	3.15	14
	NMF	well watered	3.05	12.7
	NMF	well watered	3.17	12.5
	NMF	drought stress	2.94	12.8
	NMF	drought stress	2.95	11.7
	NMF	drought stress	2.51	10.7
	NMF	drought stress	2.85	10.5

## Sheet: superoxide dismutases
				SOD Activities (Umin-1mg-1protein)
AMF	Root	drought stress		30.076
AMF	Root	drought stress		34.8278
AMF	Root	drought stress		32.8617
AMF	Root	drought stress		35.1552
AMF	Root	well watered		16.6629
AMF	Root	well watered		17.012
AMF	Root	well watered		15.6629
AMF	Root	well watered		16.5276
NMF	Root	drought stress		18.5011
NMF	Root	drought stress		17.5047
NMF	Root	drought stress		18.1632
NMF	Root	drought stress		16.8768
NMF	Root	well watered		14.8708
NMF	Root	well watered		14.3659
NMF	Root	well watered		15.3795
NMF	Root	well watered		14.161
AMF	Leaf	drought stress		27.8209
AMF	Leaf	drought stress		29.8119
AMF	Leaf	drought stress		26.3729
AMF	Leaf	drought stress		27.3599
AMF	Leaf	well watered		12.3856
AMF	Leaf	well watered		13.7094
AMF	Leaf	well watered		11.1752
AMF	Leaf	well watered		12.5098
NMF	Leaf	drought stress		18.6934
NMF	Leaf	drought stress		22.8526
NMF	Leaf	drought stress		25.842
NMF	Leaf	drought stress		23.1916
NMF	Leaf	well watered		13.2864
NMF	Leaf	well watered		11.1389
NMF	Leaf	well watered		14.6643
NMF	Leaf	well watered		10.1052

## Sheet: qPCR raw data
	Cq															Average															EXP=2^-(Cqsample-CqActin)													Log（EXP,2）
gene_id	BcMSD1a	BcMSD1b	BcFSD1	BcFSD2	BcFSD3	BcMSD2	BcCSD1c	BcCSD1a	BcCSDc	BcCSD1b	BcCSD3	BcCSD2a	BcCSD2b	Actin	ID	BcMSD1a	BcMSD1b	BcFSD1	BcFSD2	BcFSD3	BcMSD2	BcCSD1c	BcCSD1a	BcCSDc	BcCSD1b	BcCSD3	BcCSD2a	BcCSD2b	Actin	ID	BcMSD1a	BcMSD1b	BcFSD1	BcFSD2	BcFSD3	BcMSD2	BcCSD1c	BcCSD1a	BcCSDc	BcCSD1b	BcCSD3	BcCSD2a	BcCSD2b		BcMSD1a	BcMSD1b	BcFSD1	BcFSD2	BcFSD3
FL30_1	20.69	22.58	24.07	25.39	27.46	27.82	18.33	20.79	21.15	22	21.24	21.78	19.88	24.12	FL30_1	20.5767	22.6067	24.0967	25.4167	27.4867	27.8467	18.0233	20.8167	21.1767	22.0267	21.2667	21.8067	19.9067	24.1467	FL30_1	11.8762	2.90795	1.03526	0.41466	0.0987552	0.0769465	69.7119	10.0561	7.83536	4.34694	7.3615	5.06303	18.8959	FL30_1	3.57	1.54	0.05	-1.27	-3.34
FL30_1	20.48	22.79	24.28	25.6	27.67	28.03	17.54	21	21.36	22.21	21.45	21.99	20.09	24.33	FL30_2	19.1733	20.4433	22.1033	22.7533	25.2133	25.9133	17.4767	18.5233	19.0833	19.2333	19.1433	17.9533	17.0333	22.0633	FL30_2	7.4127	3.07375	0.972655	0.619854	0.112656	0.0693481	24.0284	11.6318	7.88986	7.11074	7.56846	17.2677	32.6724	FL30_2	2.89	1.62	-0.04	-0.69	-3.15
FL30_1	20.56	22.45	23.94	25.26	27.33	27.69	18.2	20.66	21.02	21.87	21.11	21.65	19.75	23.99	FL30_3	22.48	24.0633	25.9433	26.3933	28.3333	29.6033	20.4333	22.6633	22.5433	23.6633	22.6533	22.8233	21.2933	25.9333	FL30_3	10.9536	3.65533	0.993092	0.726986	0.189465	0.0785633	45.2548	9.64646	10.4831	4.82323	9.71356	8.63383	24.9333	FL30_3	3.45333	1.87	-0.01	-0.46	-2.4
FL30_2	19.06	20.47	22.13	22.78	25.24	25.94	17.17	18.55	19.11	19.26	19.17	17.98	17.06	22.09	FL30_4	20.2175	21.7075	23.4025	24.1875	26.245	27.0875	18.2425	20.0525	20.3475	21.425	20.6075	21.025	19.235	23.4075	FL30_4	9.12611	3.24901	1.00347	0.582367	0.139903	0.0780207	35.8773	10.2319	8.33973	3.95177	6.9644	5.2144	18.0322	FL30_4	3.19	1.7	0.005	-0.78	-2.8375
FL30_2	19.27	20.26	21.92	22.57	25.03	25.73	17.96	18.34	18.9	19.05	18.96	17.77	16.85	21.88	FL60_1	19.955	21.355	23.1425	23.69	25.6925	26.5825	18.1925	19.405	20.1125	21.18	20.235	20.065	18.935	23.1375	FL60_1	9.07879	3.44022	0.99654	0.681838	0.170164	0.091823	30.803	13.2921	8.13984	3.88388	7.47721	8.4123	18.411	FL60_1	3.1825	1.7825	-0.005	-0.5525	-2.555
FL30_2	19.19	20.6	22.26	22.91	25.37	26.07	17.3	18.68	19.24	19.39	19.3	18.11	17.19	22.22	FL60_2	21.6233	22.79	24.62	24.59	27.45	27.92	20.31	20.72	22.35	21.34	21.79	20.0967	19.74	24.64	FL60_2	8.09296	3.605	1.01396	1.03526	0.142595	0.102949	20.1122	15.1369	4.89056	9.84916	7.21	23.3174	29.8571	FL60_2	3.01667	1.85	0.02	0.05	-2.81
FL30_3	22.38	24.23	26.11	26.56	28.5	29.77	20.6	22.83	22.71	23.83	22.82	22.99	21.46	26.1	FL60_3	21.4067	22.63	24.3633	24.41	25.75	28.79	19.54	20.94	22.14	21.75	21.84	20.04	19.76	24.39	FL60_3	7.90811	3.38698	1.01866	0.986233	0.389582	0.0473661	28.84	10.9283	4.75683	6.23332	5.85634	20.393	24.761	FL60_3	2.98333	1.76	0.0266667	-0.02	-1.36
FL30_3	22.59	24.04	25.92	26.37	28.31	29.58	20.41	22.64	22.52	23.64	22.63	22.8	21.27	25.91	FL60_4	20.9533	21.34	23.14	23.26	25.34	27.12	18.49	19.72	20.52	21.04	20.35	19.29	18.63	23.13	FL60_4	4.52108	3.45815	0.993092	0.913831	0.216134	0.0629347	24.9333	10.6295	6.10504	4.25748	6.86852	14.3204	22.6274	FL60_4	2.17667	1.79	-0.01	-0.13	-2.21
FL30_3	22.47	23.92	25.8	26.25	28.19	29.46	20.29	22.52	22.4	23.52	22.51	22.68	21.15	25.79	FR30_1	18.47	21.73	24.35	24.74	25.84	26.1533	16.49	18.9	21.06	19.39	21.95	22.08	20.55	22.55	FR30_1	16.9123	1.76541	0.287175	0.219151	0.102238	0.0822789	66.7178	12.5533	2.80889	8.9383	1.51572	1.38511	4	FR30_1	4.08	0.82	-1.8	-2.19	-3.29
FL30_4	20.26	21.84	23.38	24.32	26.48	27.26	18.35	20.27	20.53	21.38	20.76	21.13	19.28	23.52	FR30_2	19.17	21.84	24.87	25.1	25.82	26.61	17.13	19.12	20.88	20.13	21.29	22.2	21.05	22.93	FR30_2	13.5479	2.12874	0.260616	0.222211	0.134904	0.0780207	55.7152	14.0257	4.14106	6.9644	3.11666	1.65864	3.68075	FR30_2	3.76	1.09	-1.94	-2.17	-2.89
FL30_4	20.45	22.03	23.57	24.51	26.67	27.45	18.54	20.46	20.72	21.57	20.95	21.32	19.47	23.71	FR30_3	19.7133	22.21	25.14	25.11	27.05	27.53	17.66	19.42	21.06	20.89	21.97	22.75	21.5	23.51	FR30_3	13.8967	2.46229	0.323088	0.329877	0.0859714	0.0616395	57.68	17.0299	5.46416	6.1475	2.90795	1.69349	4.02782	FR30_3	3.79667	1.3	-1.63	-1.6	-3.54
FL30_4	20.57	22.15	23.69	24.63	26.79	27.57	18.66	20.58	20.84	21.69	21.07	21.44	19.59	23.83	FR30_4	19.6967	22.46	25.33	25.52	26.78	27.5267	17.9	19.82	21.54	20.68	22.01	22.88	21.57	23.54	FR30_4	14.3535	2.11404	0.289172	0.25349	0.105843	0.0630803	49.8665	13.1775	4	7.26015	2.88786	1.58008	3.91768	FR30_4	3.84333	1.08	-1.79	-1.98	-3.24
FL60_1	19.59	20.81	22.97	23.29	25.04	26.07	17.42	18.9	19.3	21.06	19.65	20.21	18.6	22.57	FR60_1	18.23	21.4233	23.84	23.63	25.49	25.9233	16.16	17.65	19.94	18.9	20.24	21.01	20.0833	21.83	FR60_1	12.1257	1.32562	0.248273	0.287175	0.0791098	0.0585847	50.9143	18.1261	3.70635	7.6211	3.01049	1.76541	3.35582	FR60_1	3.6	0.406667	-2.01	-1.8	-3.66
FL60_1	19.3	21.1	22.68	23.58	25.33	26.36	17.71	19.19	19.59	21.35	19.94	20.1	18.89	22.86	FR60_2	19.48	22.1133	24.7967	25.14	26.04	27.0867	17.69	18.75	21.09	20.03	21.4	22.26	20.6967	22.93	FR60_2	10.9283	1.76133	0.274206	0.216134	0.115824	0.0560685	37.7918	18.1261	3.5801	7.46426	2.88786	1.59107	4.70219	FR60_2	3.45	0.816667	-1.86667	-2.21	-3.11
FL60_1	19.45	20.67	22.25	23.15	24.9	25.93	17.28	18.76	19.16	20.92	19.51	19.67	18.46	22.43	FR60_3	19.82	22.28	25.2333	25.79	27.01	27.35	17.74	18.83	21.43	20.2	21.8633	22.56	21.28	23.25	FR60_3	10.7779	1.95884	0.252905	0.171943	0.073812	0.0583146	45.5696	21.4068	3.53081	8.28212	2.61474	1.61328	3.91768	FR60_3	3.43	0.97	-1.98333	-2.54	-3.76
FL60_2	21.48	22.84	24.67	24.74	27.5	27.97	20.36	20.77	22.4	21.39	21.84	20.28	19.79	24.69	FR60_4	19.7625	22.2175	24.4575	25.2225	26.865	27.0175	18.03	19.4975	21.5525	20.855	22.0375	22.62	21.1975	23.2675	FR60_4	11.353	2.07053	0.438303	0.257921	0.0826123	0.0743254	37.7263	13.6422	3.28297	5.32396	2.34567	1.56645	4.19887	FR60_4	3.505	1.05	-1.19	-1.955	-3.5975
FL60_2	21.77	22.55	24.38	24.45	27.21	27.68	20.07	20.48	22.11	21.1	21.55	19.99	19.5	24.4	NL30_1	21.3667	22.8767	20.1067	25.8967	28.0867	27.5067	20.0767	22.3167	23.3067	23.4567	21.8467	24.2167	21.8867	24.6167	NL30_1	9.51366	3.34035	22.7848	0.411796	0.0902456	0.134904	23.2636	4.92458	2.47942	2.23457	6.82108	1.31951	6.63456	NL30_1	3.25	1.74	4.51	-1.28	-3.47
FL60_2	21.62	22.98	24.81	24.58	27.64	28.11	20.5	20.91	22.54	21.53	21.98	20.02	19.93	24.83	NL30_2	20.0133	21.4833	21.9133	24.1533	26.3033	26.5633	18.7633	20.3433	21.5233	21.5833	20.8133	22.3033	19.7033	23.0933	NL30_2	8.45614	3.05252	2.26577	0.479632	0.108067	0.0902456	20.1122	6.72717	2.96905	2.8481	4.85678	1.72907	10.4831	NL30_2	3.08	1.61	1.18	-1.06	-3.21
FL60_3	21.6	22.51	24.71	24.29	25.63	28.67	19.42	20.82	22.02	21.63	21.72	19.92	19.64	24.27	NL30_3	19.91	22.55	22.13	25.86	26.47	27.09	19.54	21.12	22.18	22.42	21.67	23.72	21.56	23.41	NL30_3	11.3137	1.81504	2.42839	0.183011	0.119908	0.0780207	14.6213	4.89056	2.34567	1.98618	3.34035	0.806642	3.605	NL30_3	3.5	0.86	1.28	-2.45	-3.06
FL60_3	21.13	22.98	23.98	24.76	26.1	29.14	19.89	21.29	22.49	22.1	22.19	20.39	20.11	24.74	NL30_4	20.5	22.37	22.78	25.64	27.02	27.52	19.53	21.59	22.67	22.69	21.78	23.61	21.65	23.77	NL30_4	9.64646	2.63902	1.98618	0.273573	0.105112	0.0743254	18.8959	4.53154	2.14355	2.11404	3.97237	1.11729	4.34694	NL30_4	3.27	1.4	0.99	-1.87	-3.25
FL60_3	21.49	22.4	24.4	24.18	25.52	28.56	19.31	20.71	21.91	21.52	21.61	19.81	19.53	24.16	NL60_1	19.8333	21.0833	21.35	24.0967	26.0733	25.0533	19.21	20.7033	19.0667	22.4933	19.5233	21.2533	19.02	23.2633	NL60_1	10.7779	4.53154	3.76678	0.561231	0.142595	0.289172	16.6026	5.89708	18.3368	1.70527	13.3614	4.02782	18.9396	NL60_1	3.43	2.18	1.91333	-0.833333	-2.81
FL60_4	20.76	21.46	23.26	23.38	25.46	27.24	18.61	19.84	20.64	21.16	20.47	19.41	18.75	23.25	NL60_2	19.6067	20.4367	21.2567	23.3667	25.1667	25.5	17.6267	19.9967	19.4267	21.8833	18.9533	20.3467	18.3867	22.5667	NL60_2	7.78124	4.37717	2.47942	0.574349	0.164938	0.130912	30.6965	5.93809	8.81524	1.60585	12.2383	4.65893	18.1261	NL60_2	2.96	2.13	1.31	-0.8	-2.6
FL60_4	21.23	20.99	22.79	22.91	24.99	26.77	18.14	19.37	20.17	20.69	20	18.94	18.28	22.78	NL60_3	19.82	22.28	25.2333	25.79	27.01	27.35	17.74	19.5567	21.43	20.2	21.8633	22.56	21.28	23.25	NL60_3	10.7779	1.95884	0.252905	0.171943	0.073812	0.0583146	45.5696	12.9361	3.53081	8.28212	2.61474	1.61328	3.91768	NL60_3	3.43	0.97	-1.98333	-2.54	-3.76
FL60_4	20.87	21.57	23.37	23.49	25.57	27.35	18.72	19.95	20.75	21.27	20.58	19.52	18.86	23.36	NL60_4	19.77	20.5967	21.3633	23.5367	25.6767	25.5233	17.7967	20.12	19.4467	21.4367	19.43	19.4267	19.1467	22.6167	NL60_4	7.19336	4.05584	2.38392	0.528509	0.119908	0.133354	28.2465	5.6438	9.00047	2.26577	9.10505	9.12611	11.0809	NL60_4	2.84667	2.02	1.25333	-0.92	-3.06
FR30_1	18.58	21.74	24.36	24.75	25.85	26.83	16.5	18.91	21.07	19.4	21.96	22.09	20.56	22.56	NR30_1	19.33	22.3	22.63	24.96	26.45	26.7667	18	19.88	21.64	20.93	22.17	23.97	21.61	22.86	NR30_1	11.5514	1.47427	1.17283	0.233258	0.0830429	0.066677	29.0406	7.88986	2.32947	3.81055	1.61328	0.463294	2.37841	NR30_1	3.53	0.56	0.23	-2.1	-3.59
FR30_1	18.43	21.89	24.51	24.9	26	25.48	16.65	19.06	21.22	19.55	22.11	22.24	20.71	22.71	NR30_2	17.51	20.71	21.2	23.25	23.8	25.2	16.34	19.03	20.03	19.07	20.83	22.07	20.2	21.08	NR30_2	11.8762	1.29235	0.920188	0.222211	0.151774	0.0575117	26.7228	4.14106	2.07053	4.02782	1.18921	0.503478	1.84038	NR30_2	3.57	0.37	-0.12	-2.17	-2.72
FR30_1	18.4	21.56	24.18	24.57	25.67	26.15	16.32	18.73	20.89	19.22	21.78	21.91	20.38	22.38	NR30_3	17.1667	20.3167	21.0367	22.6767	24.2267	24.6767	15.6367	17.2167	19.1967	18.3867	19.6367	21.5067	18.8467	20.6667	NR30_3	11.3137	1.27456	0.773782	0.248273	0.0847878	0.0620683	32.6724	10.9283	2.77022	4.85678	2.04202	0.558644	3.53081	NR30_3	3.5	0.35	-0.37	-2.01	-3.56
FR30_2	19.06	21.83	24.86	25.09	25.81	26.6	17.12	19.11	20.87	20.12	21.28	22.19	21.04	22.92	NR30_4	17.7233	20.8333	21.3433	23.3533	24.5433	25.2833	16.3833	18.4633	20.1433	19.1833	20.7333	22.2333	20.2033	21.2533	NR30_4	11.5514	1.33793	0.939523	0.233258	0.102238	0.0612138	29.2426	6.9163	2.15846	4.19887	1.43396	0.50698	2.07053	NR30_4	3.53	0.42	-0.09	-2.1	-3.29
FR30_2	19.21	21.68	24.71	24.94	25.66	26.45	16.97	18.96	20.72	19.97	21.13	22.04	20.89	22.77	NR60_1	19.4033	22.0133	24.1333	24.7733	25.5233	26.8433	17.8133	19.8033	21.7533	19.7633	22.6767	22.6233	21.3833	22.8633	NR60_1	11.0043	1.8025	0.41466	0.266093	0.15822	0.0633725	33.1285	8.33973	2.15846	8.57419	1.13813	1.18099	2.78949	NR60_1	3.46	0.85	-1.27	-1.91	-2.66
FR30_2	19.24	22.01	25.04	25.27	25.99	26.78	17.3	19.29	21.05	20.3	21.46	22.37	21.22	23.1	NR60_2	19.8167	23.3167	23.4567	25.5167	26.9167	27.1267	18.6867	20.3767	22.1367	21.5967	22.7667	24.0967	21.6967	23.3867	NR60_2	11.8762	1.04972	0.952638	0.228458	0.0865693	0.0748424	25.9921	8.05564	2.37841	3.45815	1.53688	0.61132	3.22657	NR60_2	3.57	0.07	-0.07	-2.13	-3.53
FR30_3	19.86	22.23	25.16	25.13	27.07	27.55	17.68	19.44	21.08	20.91	21.99	22.77	21.52	23.53	NR60_3	19.47	22.84	24.22	25.23	25.66	27.04	18.25	20.46	21.48	20.98	22.1367	23.84	21.51	23.29	NR60_3	14.1232	1.36604	0.524858	0.260616	0.193446	0.0743254	32.8996	7.11074	3.50642	4.95883	2.22427	0.68302	3.43426	NR60_3	3.82	0.45	-0.93	-1.94	-2.37
FR30_3	19.67	22.42	25.35	25.32	27.26	27.74	17.87	19.63	21.27	21.1	22.18	22.96	21.71	23.72	NR60_4	20.0233	23.22	24.3	25.67	26.54	27.51	18.75	20.58	22.56	21.55	23.29	24.42	22.36	23.68	NR60_4	12.6115	1.37554	0.650671	0.251739	0.137738	0.0703162	30.4844	8.57419	2.17347	4.37717	1.31039	0.598739	2.49666	NR60_4	3.65667	0.46	-0.62	-1.99	-2.86
FR30_3	19.61	21.98	24.91	24.88	26.82	27.3	17.43	19.19	20.83	20.66	21.74	22.52	21.27	23.28
FR30_4	19.55	22.44	25.31	25.5	26.76	27.84	17.88	19.8	21.52	20.66	21.99	22.86	21.55	23.52
FR30_4	19.74	22.25	25.12	25.31	26.57	27.15	17.69	19.61	21.33	20.47	21.8	22.67	21.36	23.33
FR30_4	19.8	22.69	25.56	25.75	27.01	27.59	18.13	20.05	21.77	20.91	22.24	23.11	21.8	23.77
FR60_1	18.32	21.48	23.93	23.72	25.58	25.74	16.25	17.74	20.03	18.99	20.33	21.1	20.44	21.92
FR60_1	18.2	21.76	23.71	23.6	25.46	25.73	16.13	17.62	19.91	18.87	20.21	20.98	19.92	21.8
FR60_1	18.17	21.03	23.88	23.57	25.43	26.3	16.1	17.59	19.88	18.84	20.18	20.95	19.89	21.77
FR60_2	19.39	22.09	24.64	25.05	25.95	27.01	17.6	18.66	21	19.94	21.31	22.17	20.74	22.84
FR60_2	19.51	22.01	24.76	25.17	26.07	27.09	17.72	18.78	21.12	20.06	21.43	22.29	20.86	22.96
FR60_2	19.54	22.24	24.99	25.2	26.1	27.16	17.75	18.81	21.15	20.09	21.46	22.32	20.49	22.99
FR60_3	19.93	22.39	25.31	25.9	27.12	27.46	17.85	18.94	21.54	20.31	22.24	22.67	21.39	23.36
FR60_3	19.82	22.28	25.2	25.79	27.01	27.35	17.74	18.83	21.43	20.2	21.73	22.56	21.28	23.25
FR60_3	19.71	22.17	25.19	25.68	26.9	27.24	17.63	18.72	21.32	20.09	21.62	22.45	21.17	23.14
FR60_4	18.88	21.85	25.86	24.85	26.31	26.71	17.2	18.41	20.82	19.84	23.02	21.94	20.82	22.67
FR60_4	19.29	21.96	25.77	24.96	26.42	26.82	17.31	18.52	20.93	19.95	21.53	22.05	20.93	22.78
FR60_4	19.4	22.07	25.98	25.07	26.53	26.92	17.42	18.63	21.04	20.06	21.64	22.16	21.04	22.89
NL30_1	21.48	22.99	20.22	26.01	28.2	27.62	20.19	22.43	23.42	23.57	21.96	24.33	22	24.73
NL30_1	21.37	22.88	20.11	25.9	28.09	27.51	20.08	22.32	23.31	23.46	21.85	24.22	21.89	24.62
NL30_1	21.25	22.76	19.99	25.78	27.97	27.39	19.96	22.2	23.19	23.34	21.73	24.1	21.77	24.5
NL30_2	19.9	21.37	21.8	24.04	26.19	26.45	18.65	20.23	21.41	21.47	20.7	22.19	19.59	22.98
NL30_2	20.01	21.48	21.91	24.15	26.3	26.56	18.76	20.34	21.52	21.58	20.81	22.3	19.7	23.09
NL30_2	20.13	21.6	22.03	24.27	26.42	26.68	18.88	20.46	21.64	21.7	20.93	22.42	19.82	23.21
NL30_3	20.02	22.66	22.24	25.97	26.58	27.2	19.65	21.23	22.29	22.53	21.78	23.83	21.67	23.52
NL30_3	19.88	22.52	22.1	25.83	26.44	27.06	19.51	21.09	22.15	22.39	21.64	23.69	21.53	23.38
NL30_3	19.83	22.47	22.05	25.78	26.39	27.01	19.46	21.04	22.1	22.34	21.59	23.64	21.48	23.33
NL30_4	20.39	22.26	22.67	25.53	26.91	27.41	19.42	21.48	22.56	22.58	21.67	23.5	21.54	23.66
NL30_4	20.53	22.4	22.81	25.67	27.05	27.55	19.56	21.62	22.7	22.72	21.81	23.64	21.68	23.8
NL30_4	20.58	22.45	22.86	25.72	27.1	27.6	19.61	21.67	22.75	22.77	21.86	23.69	21.73	23.85
NL60_1	19.94	21.09	21.79	23.81	25.8	25.36	19.15	20.71	18.89	22.5	19.47	21.26	18.65	23.37
NL60_1	19.77	20.82	21.02	24.13	26.2	24.39	19.23	21.14	19.02	22.13	19.78	21.39	19.18	23.2
NL60_1	19.79	21.34	21.24	24.35	26.22	25.41	19.25	20.26	19.29	22.85	19.32	21.11	19.23	23.22
NL60_2	19.5	20.63	21.15	23.16	25.06	25.46	17.52	19.89	18.92	22.11	19.08	20.24	18.68	22.46
NL60_2	19.67	20.8	21.32	23.63	25.23	25.13	17.69	20.06	19.49	21.98	18.65	20.41	18.15	22.63
NL60_2	19.65	19.88	21.3	23.31	25.21	25.91	17.67	20.04	19.87	21.56	19.13	20.39	18.33	22.61
NL60_3	18.95	19.63	21.39	22.81	24.98	24.5	15.83	19.43	17.89	21.16	17.81	18.84	17.09	21.38
NL60_3	19.03	19.41	21.17	22.59	24.76	24.28	15.61	19.61	18.17	21.24	17.99	18.72	16.87	21.16
NL60_3	18.75	19.23	20.99	23.11	24.58	24.1	15.43	19.63	17.79	21.76	17.81	19.24	16.69	20.98
NL60_4	19.93	20.59	21.28	23.83	25.47	25.25	17.59	19.58	19.34	21.23	19.39	19.42	18.94	22.41
NL60_4	19.55	20.21	21.63	23.55	25.69	25.37	17.81	19.8	19.56	21.45	19.61	19.54	19.16	22.63
NL60_4	19.83	20.99	21.18	23.23	25.87	25.95	17.99	20.98	19.44	21.63	19.29	19.32	19.34	22.81
NR30_1	19.58	22.55	22.88	25.21	26.7	26.95	18.25	20.13	21.89	21.18	22.42	24.22	21.86	23.11
NR30_1	19.4	22.37	22.7	25.03	26.52	26.87	18.07	19.95	21.71	21	22.24	24.04	21.68	22.93
NR30_1	19.01	21.98	22.31	24.64	26.13	26.48	17.68	19.56	21.32	20.61	21.85	23.65	21.29	22.54
NR30_2	17.26	20.46	20.95	23	23.55	24.95	16.09	18.78	19.78	18.82	20.58	21.82	19.95	20.83
NR30_2	17.44	20.64	21.13	23.18	23.73	25.13	16.27	18.96	19.96	19	20.76	22	20.13	21.01
NR30_2	17.83	21.03	21.52	23.57	24.12	25.52	16.66	19.35	20.35	19.39	21.15	22.39	20.52	21.4
NR30_3	17.27	20.42	21.14	22.78	24.33	24.78	15.74	17.32	19.3	18.49	19.74	21.61	18.95	20.77
NR30_3	17.19	20.34	21.06	22.7	24.25	24.7	15.66	17.24	19.22	18.41	19.66	21.53	18.87	20.69
NR30_3	17.04	20.19	20.91	22.55	24.1	24.55	15.51	17.09	19.07	18.26	19.51	21.38	18.72	20.54
NR30_4	17.62	20.73	21.24	23.25	24.44	25.18	16.28	18.36	20.04	19.08	20.63	22.13	20.1	21.15
NR30_4	17.7	20.81	21.32	23.33	24.52	25.26	16.36	18.44	20.12	19.16	20.71	22.21	20.18	21.23
NR30_4	17.85	20.96	21.47	23.48	24.67	25.41	16.51	18.59	20.27	19.31	20.86	22.36	20.33	21.38
NR60_1	19.51	22.12	24.24	24.88	25.63	26.95	17.92	19.91	21.86	19.87	22.65	22.73	21.49	22.97
NR60_1	19.65	22.26	24.38	25.02	25.77	27.09	18.06	20.05	22	20.01	22.79	22.87	21.63	23.11
NR60_1	19.05	21.66	23.78	24.42	25.17	26.49	17.46	19.45	21.4	19.41	22.59	22.27	21.03	22.51
NR60_2	19.71	23.21	23.35	25.41	26.81	27.02	18.58	20.27	22.03	21.49	22.66	23.99	21.59	23.28
NR60_2	20.07	23.57	23.71	25.77	27.17	27.38	18.94	20.63	22.39	21.85	23.02	24.35	21.95	23.64
NR60_2	19.67	23.17	23.31	25.37	26.77	26.98	18.54	20.23	21.99	21.45	22.62	23.95	21.55	23.24
NR60_3	19.43	22.8	24.18	25.19	25.62	27	18.21	20.42	21.44	20.94	22.23	23.8	21.47	23.25
NR60_3	19.32	22.69	24.07	25.08	25.51	26.89	18.1	20.31	21.33	20.83	22.12	23.69	21.36	23.14
NR60_3	19.66	23.03	24.41	25.42	25.85	27.23	18.44	20.65	21.67	21.17	22.06	24.03	21.7	23.48
NR60_4	19.92	23.26	24.34	25.71	26.58	27.55	18.79	20.62	22.6	21.59	23.33	24.46	22.4	23.72
NR60_4	20.28	23.37	24.45	25.82	26.69	27.66	18.9	20.73	22.71	21.7	23.44	24.57	22.51	23.83
NR60_4	19.87	23.03	24.11	25.48	26.35	27.32	18.56	20.39	22.37	21.36	23.1	24.23	22.17	23.49
[truncated: 22 more columns]
