# Supplementary material for: Arbuscular mycorrhizal fungi enhance drought resistance in Bombax ceiba by regulating SOD family genes
Source: PeerJ journal article supplement (doi:10.7717/peerj.17849), 2024-08-07
Supplement: Supplementary_figures_and_tables.zip [file supplementary table.xlsx]

## Sheet: Sheet1
Table S1: Gene-specific primers for quantitative reverse transcription (qRT)-PCR analysis
IDs	Genes	Forward Primer (5’- 3’)	Reverse Primer(5’- 3’)	CDS
evm.model.Scaffold417.34	BcCSD1a	GACTACTGTGACCGGGAACA	CCAGTGAGAGGAATGGTCGT	ATGGTGAAGGCTGTTGCCGTCCTTAGCAGCAGTGAAGGTGTTAGTGGAACTGTTTTCTTT GCCCAAGAAGGAGATGGTCCGACTACTGTGACCGGGAACATTTCTGGCCTTAAGCCTGGT CTTCATGGCTTCCATGTTCATGCCTTGGGAGACACGACTAACGGTTGCATGTCAACAGGA CCCCACTTTAATCCTGCTAGCAAAGAGCATGGTGCCCCAGACGATGAGAATCGCCATGCT GGTGATCTAGGAAATGTCACTGTTGGTGATGATGGTATGAATATTTGCCTTCTTTCAACG ACCATTCCTCTCACTGGACCACACTCCATCATTGGAAGAGCTGTTGTTGTCCATGCAGAT CCTGATGATCTCGGCAAGGGGGGCCATGAGCTT…
evm.model.Scaffold167.187	BcCSD1b	CCATGTTCATGCTCTTGGGG	TGCATGGACAACAACAGCTC	ATGGTAAAGGCCGTTGCCGTCCTTAGCAGCAGTGAAGGTGTTAGTGGAACTGTTTTCTTT GCTCAAGAGGGAGATGGTCCAACTACCGTGACTGGGAACATTTCTGGTCTTAAGCCTGGG CTCCATGGCTTCCATGTTCATGCTCTTGGGGACACAACAAACGGTTGCATGTCAACAGGA CCTCACTTTAATCCTGCTGGCAAAGAGCATGGTGCCCCCGATGATGAGAATCGCCATGCT GGTGATCTAGGAAATGTCACTGTTGGTGATGATGGCGCTGCGAGTTTCTCTATTATTGAC AAACAGATTCCTCTTACTGGGCCACACTCCATTATTGGAAGAGCTGTTGTTGTCCATGCA GATCCCGATGATCTTGGCAAGGGGGGCCACGAG…
evm.model.Scaffold52.228	BcCSD1c	CGCCCCAGAAGACGAAAATC	CCGATAATACCGCAAGCCAC	ATGGTGAAGGCCGTTGCCGTCCTTAGCAGCAGTGAAGGTGTTAGTGGAACTGTTTTCTTT GCTCAAGAGGGAGATGGTCCAACTACCGTGACAGGGAATGTTTCTGGTCTTAAGCCTGGG CTCCATGGATTCCATGTTCATGCCCTTGGGGACACAACAAATGGTTGCATGTCAACAGGA CCCCACTTTAATCCTCATGGCAAAGAGCATGGCGCCCCAGAAGACGAAAATCGCCATGCT GGTGATCTAGGAAATATAACTGCTGGTGATGATGGCACTGCAAGTTTCTGTATCACTGAC AAACAGATTCCTCTCACCGGATCACACTCCATTATTGGAAGAGCTGTTGTTGTCCATGCG GATCCTGATGACCTTGGCAAGGGGGGCCATGAG…
evm.model.Scaffold145.260	BcCSD2a	GGTGTCTCTCTCAAGCTCCA	TGCAGCCATTTGTTGTGTCA	ATGCAAGCTGCGGCAATAGCAGCTATGGCAGCCCACGCTGTTCTCGCCACTACCCCATTT CAACACACTCTCCTTTTCCCACCCCTGACTGACCCTTCAAACCCACCTGTTCTTCAATCC TCATTTCGTGGTGTCTCTCTCAAGCTCCATCGTCAATCACTCTCCATTGCTGCAGCTATC CCCAAAAAGCCTTTTTCTGTGGTTGCTGTTACCAAGAAAGCTGTCGCTGTTCTTAAAGGT GATTCCAAAGTTGAAGGCGTTGTCACGTTGACCCAAGAAGATGGTGGTCCTACAACTGTG AATGTTCGTGTTACTGGTCTTACTCCAGGGCCTCATGGTTTCCACCTTCATGAGTTTGGT GACACAACAAATGGCTGCATGTCCACAGGAGCA…
evm.model.Scaffold25.390	BcCSD2b	GCTGATGGTAGAGTGGCAGA	CTGAACACCCTCCCTCACAT	ATGGCAGCCCACGCAATTCTTACCACAACCCCATCTCGCTATACTCTCCTTTCTTTAACC CCAACTAACCCTTCAAACCACCCACCGGTTCTTCTATCCTCATTTCGTGGTGTGTCTCTC AAGCTCCCTCGTCGATCCTTCTCCGTTGTTGCCACTACACCCAAGAAGCCGTTTTCTGTG CTTGCTGTTACCAAGAAAGCAGTCGCAGTTCTTAAAGGTGCTACAACTGTGAATGTTCGT ATTACCGGTCTTACTCCAGGGCCTCATGGGTTCCACCTACATGAGTATGGTGACACAACA AATGGATGCATGTCCACAGGAGCACATTTCAATCCTAACAATATGACACACGGTGCTCCT GAGGATGAAATACGCCATGCGGGTGACCTGGGA…
evm.model.Scaffold167.161	BcCSD3	ATTCCACTGGGCCTCACTTT	CCACTAAGGGGAATCTGCCA	ATGGAAGGGATAACCCATGTCCAAGGAAAGATAACAGGCCTATCTCCTGGCCTTCATGGC TTCCATATCCATGCCCTTGGTGATACTACCAATGGCTGCAATTCCACTGGGCCTCACTTT AATCCATTAAAGAAGGATCATGGAGCTCCAAGTGCCGGAGAGCGCCATGCCGGTGATTTG GGTAACATTATCGCAGGCCATGATGGGGTTGCCGAGGTTTCAATTAAAGATTGGCAGATT CCCCTTAGTGGGCAGCATTCCATTTTAGGGAGGGCAGTTGTTGTGCATGCTGATCCTGAT GATCTTGGCAAAGGTGAAATATTTGGTTTATACAAATTACAAGAGTTTGCATCTTCAAAG TCTATTGCTAAAAAGAAGGATATATTTCTTTGT…
evm.model.Scaffold89.460	BcCSDc	ACCATGACTGAGGCATTGGA	CTTGCAGCACCTCTTGTCAG	ATGGATTCACCCACATCTTATCAAAACCCCTCTCAGGAAAATGGGTCCTTGCCTGACCTT CTTACAGAGTATATGGTGGATATGAAGTGTGAAGGCTGTGTTACTGCGGTCAAGAATAAG TTACAAACAGTTAATGGAGTCAAGAGTGTGGAAGTGGACTTGAGCAATCAAGTGGTGAGA ATACTTGGTTCTTCGCCTGTGAAAACCATGACTGAGGCATTGGAGCAGATTGGTCGCAAA GCTAGATTAATAGGCCAAGGACTGGCAGAAGACTTTTTAGTTTCTGCAGCTGTTGCTGAA TTAAAAGGTCCAGAAATTTTTGGTGTAGTTCGATTTGCTCAAGTGAGCATGGAATTAGCT AGGATTGAAGCCAATTTTAGTGGTTTGTTGCCT…
evm.model.Scaffold63.64	BcFSD1	CTGACGCTGGCATTACTTCC	TCCAAGGTTTCTCGGCTCAT	ATGACGGCTGCTATTTCCATGGCTAATACACTGACGCTGGCATTACTTCCCTCCCAAGGG CTTCGCGGACCCACTCGTAGCCTGCCACTTACAAATCCCCAGAGACGCTGTCTGAGAAAG AGTGTTTCAAATTTGATAACAGCAAAATTTGAGCTAAAGCCACCTCCATATCCGCTGAAT GCACTGGAACCCAATATGAGCCGAGAAACCTTGGAGTATCATTGGGGAAAACACCATAGA ACCTATGTGGAGAACCTAAACAAGCAAATTGTAGGAACAGAGCTAGAAGGGTTGTCCTTG GAAGACATTGTCATTGTTTCGTACAATAACGGCGATATACTTCCTGCCTTTAACAATGCT GCCCAGGCCTGGAACCATGAATTCTTCTGGGAA…
evm.model.Scaffold65.429	BcFSD2	TGGGAGTCTATGCAACCTGG	TGTTTTGACTACCGCAAGCC	ATGGCTTGTCAGCTCCTGGTCACCGACTTCATTCTCCCTCTGCAAAGCCCCAAGATTTCT CGCAGGAGCGAGCAGCGGAAAGGAAGCTCTAATGGGTCGCAAAAAGTTTCTACAACTGTT GCTTACTATGGGATAAAGAAGCCTCCTTATAACCTTGATGCGTTGGAGCCATATATGAGT AAGAGGGCATTGGAGGTGCATTGGGGCATCCGTCATCGTGGCTTTGTAGAAGATCTAAAT AAACAGCTTGGAAAAAGTGATATACTGTATGGCTACACTATGGATGAACTTGTCATAGCA ACATACAACAATGGGAACCCCCTACCTGAATTTAACAATGCAGCAGAGGTGTGGAACCAT GACTTCTTTTGGGAGTCTATGCAACCTGGAGGT…
evm.model.Scaffold967.1	BcFSD3	CGTCATCGTGGCTTTGTAGA	TGTTTTGACTACCGCAAGCC	ATGTTGAGAATGTTTAGCGAGCAGCGGAAAGGAAGCTCTAATGGGTCGCAAAAAGTTTCT ACAACTGTTGCTTACTATGGGATAAAGAAGCCTCCTTATAACCTTGATGCGTTGGAGCCA TATATGAGTAAGAGGGCATTGGAGGTGCATTGGGGCATCCGTCATCGTGGCTTTGTAGAA GATCTAAATAAACAGCTTGGAAAAAGTGATATACTGTATGGCTACACTATGGATGAACTT GTCATAGCAACATACAACAATGGGAACCCCCTACCTGAATTTAACAATGCAGCAGAGGTG TGGAACCATGACTTCTTTTGGGAGTCTATGCAACCTGGAGGTGGTGGCATGCCCAAACTT GAGGCAAGAAGAAGGCGGCTTGCGGTAGTCAAA…
evm.model.Scaffold431.23	BcMSD1a	AATGAAGGAGGAGGTGAGCC	CCCAAACATCTATGCCCAGC	ATGGCTCTCCGTTCATTAGCCACCAGAAAAACCCTAACCTTGGGCCTCAACTCCACCAGG CTGCCTCAATATCGATCATTGCAGACCTTCTCTCTCCCCGATCTTACTTACGACTATGGC GCACTTGAGCCGGCTATCAGTGGAGAGATCATGCAGCTCCATCACCAGAAGCATCATCAA ACTTACGTCACCAACTTTAACAAGGCTTTGGAGCAGCTCGATGAGGCTATCCAGAAAGGT GATTCTTCCACCATCGTTAAGTTGCAAAGCGCCATCAAGTTCAACGGCGGAGGTCACATC AACCACTCTATTTTTTGGAAGAATCTTGCCCCTATTAATGAAGGAGGAGGTGAGCCTCCA AAAGCCTCCTTGGGTTGGGCTATTGACACAAAC…
evm.model.Scaffold101.63	BcMSD1b	GCAGCTACATCACCAGAAGC	GGTTCACCTCCTCCTTCACA	ATGGCTCTTCGGTCATTAGCCAGCAGGAAAACCTTAACCTTGGGCCTCAACTCGACGAGG CTTACTCACTTTCGTGCATTGCAGACCTTGTCGCTCCCCGATCTTCCTTACGACTATGGC GCACTTGAGCCGGCCATCAGTGGAGAGATCATGCAGCTACATCACCAGAAGCATCATCAA ACTTACATCACTAACTATAACAAGGCTTTGGAGCAGCTCGATGAGGCTATCCAGAAAGGT GATTCTTCCACCGTCGCTAAGTTGCAAAGCACCATCAAGTTCAATGGCGGAGGTCATATC AACCACTCAATTTTTTGGAAGAATCTTGCCCCTCTTTGTGAAGGAGGAGGTGAACCTCCA AAAGGTTCTTTGGGTTGGGCTATTGACACAAAC…
evm.model.Scaffold502.2	BcMSD2	AACTTCAACCGAGCTCTGGA	TAGCCTTACCTAGAGCCCCA	ATGGCTCTAAGAGTTGCGACCAAATCACAAACCAGAAATATTCCAAGGTCAGGAAGAGGA GTTCTAAAGTTAGACCATAACCATTTCCACCCGCTTAAGACGTTTACGCTGCCTGACCTC CCCTATGACTATCACGAACTGGAGCCAGTCATCAGCGCTGAGATAATGGAGATCCACCAC CAAAAGCACCAGCAGACTTACATCACCAACTTCAACCGAGCTCTGGAGCAGCTCGACCGT GCCATGTCCAAGCCCGACTCTCCTACAATCTTCAAGCTCCAAAGTGCCATCAAATTCAAT GGCGGAGGTCATGTAAACCACTCGATTTTCTGGAAGAATCTTGCTCCTGTTACCAAAGGA GGTGGTGAGCCTCCGGTTGGGGCTCTAGGTAAG…
—	Actin gene	TTTTGGCCAAGAATGCGGTT	ATGGACTGGGGCAACTGTAG

## Sheet: Sheet2
Table S2a: Homology matrix of Zn/Cu-SOD protein sequences
Gene name	Amino Acid identity
BcCSD1a	1
BcCSD1b	0.921	1
BcCSD1c	0.887	0.941	1
BcCSD2a	0.556	0.566	0.586	1
BcCSD2b	0.547	0.584	0.591	0.761	1
BcCSD3	0.602	0.628	0.628	0.504	0.55	1
BcCSDc	0.261	0.273	0.266	0.212	0.251	0.258	1
Table S2b: Homology matrix of Fe-SOD and Mn-SOD protein sequences
Gene name	Amino Acid identity
BcFSD1	1
BcFSD2	0.445	1
BcFSD3	0.453	0.954	1
BcMSD1a	0.332	0.262	0.261	1
BcMSD1b	0.342	0.27	0.276	0.887	1
BcMSD2	0.267	0.26	0.23	0.678	0.689	1

## Sheet: Sheet3
Table S3: Sequences applied for polygenetic analysis
Species	Number	Accession Index	Name	Sequences
Oryza sativa	1	BAD67906	OsFSD1	MAFATLVGVGGLSPALFSPSRPLSCSSSTSVSAPFILRAGGGGDARRHGLRRLVTPLRGSACRGESTNSRVLQCANEANVVTEDDIVNDGIDDETASDAEMDEDAEANGDESSGTDEDASVSWIEQQPLPYPSDALEPYISKETVEQHWGVHQNIHVERLNGMIGGSEWEGMSLGQMMLSSFNEGREAPHPPFFHAAQIWNHDFYWRSMQPGGGGKPPERLLKFINRDFGSYDGMIRQFMDAASTQFGSGWVWLCYKTSKLPHVKSRSPIPSDNYGRLVISKSPNAINPLVWGHSPLLAIDLWEHAYYLDYEDRRSDYVSTFLEKLVSWETVESRLKKAVQRAVERDEYVSTKHIRKQLLARAKSQIRAMPQQVNGDAREQTSGQEKSLGV
	2	XP_015642496	OsFSD2	MAAFASALRVLPSPPAAVPRRLRSREQRQGCRSRRYSKVVAYYALTTPPYKLDALEPYISKRTVELHWGKHQQDYVDSLNKQLATSMFYGYTLEELIKEAYNNGNPLPEYNNAAQVWNHHFFWESMQPEGGGSPGRGVLQQIEKDFGSFTNFREEFIRSALSLLGSGWVWLVLKRKERKFSVVHTQNAISPLALGDIPLINLDLWEHAYYLDYKDDRRMYVTNFIDHLVSWDTVTLRMMRAEAFVNLGEPNIPVA
	3	AAA57130	OsMSD1a	MALRTLASRKTLAAAALPLAAAAAARGVTTVALPDLPYDYGALEPAISGEIMRLHHQKHHATYVANYNKALEQLDAAVAKGDAPAIVHLQSAIKFNGGGHVNHSIFWNNLKPISEGGGDPPHAKLGWAIDEDFGSFEALVKKMSAEGAALQGSGWVWLALDKEAKKLSVETTANQDPLVTKGANLVPLLGIDVWEHAYYLQYKNVRPDYLSNIWKVMNWKYAGEVIENAT
	4	AAA57131	OsMSD1b	MALRCVASRKTLAAAALPLAAAAAARGVTTVALPDLPYDYGALEPAISGEIMRLHHQKHHATYVANYNKALEQLDAAVAKGDAPAIVHLQSAIKFNGGGHVNHSIFWNNLKPISEGGGEPPHAKLGWAIDEDFGSFEALVKKMSAEGAALQGSGWVWLALDKEAKKLSVETTANQDPLVTKGANLVPLLGIDVWEHAYYLQYKNVRPDYLSNIWKVMNWKYAGEVYENATA
	5	AIW09154.1	OsCSD3	MAGKAGGLKGVALIGGAGGNSAVAGALHFFQDPSTGYTEVRGRVTGLAPGLHGFHIHSFGDTTNGCNSTGPHFNPHNKSHGAPSDDERHVGDLGNIVANKDGVADIFIKDLQISLSGPHSILGRAVVVHADSDDLGRGGHELSKTTGNAGTRIGCGIIGLRSAV
	6	XP015647771	OsCSD2	MVKAVAVLASSEGVKGTIFFSQEGDGPTSVTGSVSGLKPGLHGFHVHALGDTTNGCMSTGPHFNPTGKEHGAPQDENRHAGDLGNITAGADGVANVNVSDSQIPLTGAHSIIGRAVVVHADPDDLGKGGHELSKTTGNAGGRVACGIIGLQG
	7	AAA33917	OsSOD1	MVKAVVVLGSSEIVKGTIHFVQEGDGPTTVTGSVSGLKPGLHGFHIHALGDTTNGCISTGPHYNPAGKEHGAPEDETRHAGDLGNVTAGEDGVANIHVVDSQIPLTGPNSIIGRAVVVHADPDDLGKGGHELSKTTGNAGGRVACGIIGLQG
	8	ABF95937	OsCSD1	MVQVISDELRLSPLTGRALNTGQRRIYPVVPNYLDTGSSAKELGVTERRQSVTLGARALNVGWWLQLQAASLTTNTTAHRWREGNLPEAPDSKPAGVASPPPSSSSSSPRGSPEITLTMVKAVVVLGSSEIVKGTIHFVQEGDGPTTVTGSVSGLKPGLHGFHIHALGDTTNGCMSTGPHYNPAGKEHGAPEDETRHAGDLGNVTAGEDGVANIHVVDSQIPLTGPNSIIGRAVVVHADPDDLGKGGHELSKTTGNAGGRVACGIIGLQG
Dimocarpus longan	9	ACJ07160	DLFSD2	MVQRRCTRKSRPTTLSAKFELKPPPYPLNALEPHMSRDTLEYHWGKHHRTYVENLNKQTAGTELDGMSLEEVVVVSYNRGYFLPSFNNAAQAWNHDFFWESMKPGGGGKPSGELLQMIERDFGSFERFLSEFKSAAATQFGSGWAWLCYKANRLDVDNAINPLPSDEDKKLVVVKSPNAVNPLVWDYSPLLTIDVWEHAYYLDFQNRRPDYISVFMDKLVSWEAVSRRLEIAKARAAEREVEEEIRKQEEEKEQESDGEAVEMYLDSDADDLERD
	10	ADK70236	DLFSD1	MVSLSPSLTHLPVTEWKSPKLPDWKRQTPPRKVVAYYGLKTPPYKLDALEPYMSKRTLEMHWGEHHRGYVDGLNKQLEKSDLLYGYTMDELVKVTYNNGNPLPEFNNAAQVWNHDFFWESMQPGGGDMPRFGLLDQIEKDFGSFSNFRENFIEAALTLFGSGWVWLALKREERRLEVMKTSNAINPLVWDDIPIISLDMWEHAYYLDYNNDKAKYVNVFMNHLVSWNAAMSRMARAEAFVNLGEPKIPIA
	11	ACM17484	DLMSD1a	MALRSLFNTRTLARPARTVGLGLRGIQTVSLPDLQYDYGALEPAISGEIMQLHHQKHHQAYVTNYNKALEQLDQAISKGDTSTVVKLQSAIKFNGGGHVNHSIFWKNLAPANEGGGEPPKSSLGWAIDTHFGSLEALVQKMNADGAALQGSGWVWLGLDKELKRLVVETTGNQDPLVTKGPSLVPLLGIDVLGACILPTVQECQTRLSEKHLESHELELCQ
	12	ADK70384	DLMSD1b	MALRSLFNTRTLARPARTVGLGLRGIQTVSLPDLQYDYGALEPAISGEIMQLHHQKHHQAYVTNYNKALEQLDQAISKGDTSTVVKLQSAIKFNGGGHVNHSIFWKNLAPANEGGGEPPKSSLGWAIDTHFGSLEALVQKMNADGAALQGSGWVWLGLDKELKRLVVETTGNQDPLVTKGPSLVPLLGIDVLGACILPTVQECQTRLSEKHLESHELELCQ
	13	ADK70230	DLCSD2	MQAAIAAMAAHTILTASPPFSHHPLLSTFPSPNTLTRTSSFRGVSLNPPQRTTFTLTAVASKPFTVVAAVKKAVAVLKGNSNVEGVVSLTQENDGPTTVNVRITGLTPGPHGFHLHEYGDTTNGCMSTGAHFNPNSMTHGAPEDEVRHAGDLGNVVANANGVAEATIVDNQIPLSGPNTVIGRALVVHELEDDLGKGGHELSLSTGNAGGRLACGVVGLTPV
	14	ADG26762.2	DLCSD3	MESGKSTVKAVAVISSADNNVRGSLHFLQHPNGVTHVKGTIFGLKPGLHGFHIHALGDTTNGCNSTGPHFNPLKKDHGAPSDTERHAGDLGNIVAGSDGVAAVSISDRQIPLSGQHSILGRAVVVHADPDDLGKGGHELSKTTGNAGGRIGCGIIGLQSSV
	15	ADK70176.2	DLCSD1	MVKAVAVLNGSEGVKGTVNFTQEGDGPTTVTGSLCGLKPGLHGFHVHALGDTTNGCMSTGPHFNPAAKEHGSPEDENRHAGDLGNVNVGDDGTVSFTIVDKQIPLTGPNSVVGRAVVVHSDPDDLGKGGHELSKSTGNAGGRLACGVIGLQA
Populus trichocarpa	16	XP002325924	PtMSD	MALRSLVCRKSLGLGSSSSFKLHFRGLQTFSLPDLPYDYGALEPAISGEIMQLHHQKHHQTYITNYNKAVEQLHHAMEKGDSSAVVKLQSAIKFNGGGHVNHSIFWKNLSPVSERGGESPHGSLGWAIDEHFGSLDALIQKMSTEGAALQGSGWVWFGLDKESKKLVVETTANQDPLVTKGPLVPLLGIDVWEHAYYLQYKNARPDYLKNIWKVMNWKYAGEVYDKEHS
	17	XP006384962	PtCSD3	MQAAAMAAHAILTATPPTRYPLLSPLPPNHSSFHGVSLKLPRQSFSFSLAAKKQQPPFVVAATKKAVAVLKGTSSVEGVVTLSQEDDGPTTVSVRITGLTPGPHGFHLHEFGDTTNGCMSTGPHFNPKKLTHGAPEDEIRHAGDLGNIVANADGVAEATIVDSQIPLSGPNAVIGRALVVHELEDDLGKGGHELSSTTGNAGGRLACGVVGLTPI
	18	XP_002319157.1	PtCSD3a	MATGSVKAVALITGDSIVRGSLHFIQEPNGATHVTGRITGLSPGLHGFHIHALGDTTNGCNSTGPHFNPLKKDHGAPSDKERHAGDLGNIIAGSDGVAEVSIKDLQIPLSGMHSILGRAVVVHADPDDLGKGGHELSKTTGNAGARVGCGIVGLKSSV
	19	XP_002325843.1	PtCSD3b	MATGSVKAVALITGDSNVRGSLHFIQEPNGATHVTGRIAGLSPGLHGFHIHALGDTTNGCNSTGPHFNPLKKDHGAPCDNERHAGDLGNIIAGSDGVAEVSITDFQIPLSGMHSILGRAVVVHADPDDLGKGGHDLSKTTGNAGARVGCGIIGLKSSV
	20	ABN58428.1	PtCSD1a	MVKAVAVLNSSEGVSGTIFFTQEGDGQTTVTGNLSGLKPGLHGFHVHALGDTTNGCMSTGPHFNPVGKEHGAPEDENRHAGDLGNVTVGDDGTATFTIIDKQIPLTGPHSIIGRAVVVHGDPDDLGKGGHELSKTTGNAGGRVACGIIGLQG
	21	XP_006382702.3	PtCSD2	MVKAVAVLNSSEGVSGTIFFTQEGDGPTTVTGNLSGLKPGLHGFHVHALGDTTNGCMSTGPHFNPVGKEHGAPEDENRHAGDLGNVTVGDDGTATFTIIDKQIPLTGPHSIIGRAVVVHGDPDDLGKGGHELSKTTGNAGGRVACGIIGLQG
	22	XP_002319589.1	PtCSD1b	MVKAVAVLNSSEGVKGTINFTQEGDGPTTVTGSLCGLKPGLHGFHVHALGDTTNGCMSTGPHFNPVGKEHGAPEDENRHAGDLGNVTVGDDGTATVSIIDNQIPLTGPNSIVGRAVVVHADPDDLGKGGHELSKTTGNAGGRVACGVIGLQG
	23	XP_002307154	PtFSD3	MVAAAATATAANPLTCSLFPSQGLRGTTSGLQWTKRQCTRKASALTVTAKFELKPPPYPMNALEPHMSKDTFEYHWGKHH RAYVNNLNKQIEGTELDDMSLDDVVLITYNKGDPLPAFNNAAQAWNHEFFWESMKPGGGGKPSGELLQLMERDFGSFDKF VEEFKSAAATQFGSGWAWLVYKANRLDVGNAVNPCPSEEDKKLVVVKSPNAVNPLVWDYYHAYYLDFQNQRPDYTSNFME RLVSWDAVSARLEVARARAAEREIEEARKRKEEEEGNFTDKEPAEIFIDGVADDSETD
	24	XP_024442811	PtFSD1	MVAAAATATAANPLTCSLFPSQGLRGTTSGLQWTKRQCTRKASALTVTAKFELKPPPYPMNALEPHMSKDTFEYHWGKHH RAYVNNLNKQIEGTELDDMSLDDVVLITYNKGDPLPAFNNAAQAWNHEFFWESMKPGGGGKPSGELLQLMERDFGSFDKF VEEFKSAAATQFGSGWAWLVYKANRLDVGNAVNPCPSEEDKKLVVVKSPNAVNPLVWDYYHAYYLDFQNQRPDYTSNFME RLVSWDAVSARLEVARARAAEREIEEARKRKEEEEGNFTDKEPAEIFIDGVADDSETD
Arabidopsis thaliana	25	NP_001077494	AtCSD1	MAKGVAVLNSSEGVTGTIFFTQEGDGVTTVSGTVSGLKPGLHGFHVHALGDTTNGCMSTGPHFNPDGKTHGAPEDANRHAGDLGNITVGDDGTATFTITDCQIPLTGPNSIVGRAVVVHADPDDLGKGGHELSLATGNAGGRVACGIIGLQG*
	26	NP_563910	AtCSDc	MASILRSVATTSAVVAAASAIPIAIAFSSSSSSSSTNPKSQSLNFSFLSRSSPRLLGLSRSFVSSPMATALTSDRNLHQEDRAMPQLLTEFMVDMTCEGCVNAVKNKLETIEGIEKVEVDLSNQVVRILGSSPVKAMTQALEQTGRKARLIGQGVPQDFLVSAAVAEFKGPDIFGVVRFAQVSMELARIEANFTGLSPGTHSWCINEYGDLTNGAASTGSLYNPFQDQTGTEPLGDLGTLEADKNGEAFYSGKKEKLKVADLIGRAVVVYKTDDNKSGPGLTAAVIARSAGVGENYKKLCSCDGTVIWEATNSDFVASKV*
	27	NP_565666	AtCSD2	MAATNTILAFSSPSRLLIPPSSNPSTLRSSFRGVSLNNNNLHRLQSVSFAVKAPSKALTVVSAAKKAVAVLKGTSDVEGVVTLTQDDSGPTTVNVRITGLTPGPHGFHLHEFGDTTNGCISTGPHFNPNNMTHGAPEDECRHAGDLGNINANADGVAETTIVDNQIPLTGPNSVVGRAFVVHELKDDLGKGGHELSLTTGNAGGRLACGVIGLTPL*
	28	NP_187703	AtMSD1	MAIRCVASRKTLAGLKETSSRLLRIRGIQTFTLPDLPYDYGALEPAISGEIMQIHHQKHHQAYVTNYNNALEQLDQAVNKGDASTVVKLQSAIKFNGGGHVNHSIFWKNLAPSSEGGGEPPKGSLGSAIDAHFGSLEGLVKKMSAEGAAVQGSGWVWLGLDKELKKLVVDTTANQDPLVTKGGSLVPLVGIDVWEHAYYLQYKNVRPEYLKNVWKVINWKYASEVYEKENN*
	29	NP_191194	AtMSD2	MTTTVIIIIFVAIFATTLHDARGATMEPCLESMKTASLPDLPYAYDALEPAISEEIMRLHHQKHHQTYVTQYNKALNSLRSAMADGDHSSVVKLQSLIKFNGGGHVNHAIFWKNLAPVHEGGGKPPHDPLASAIDAHFGSLEGLIQKMNAEGAAVQGSGWVWFGLDRELKRLVVETTANQDPLVTKGSHLVPLIGIDVWEHAYYPQYKNARAEYLKNIWTVINWKYAADVFEKHTRDLDIN*
	30	AAA32791	AtFSD1	MAASSAVTANYVLKPPPFALDALEPHMSKQTLEFHWGKHHRAYVDNLKKQVLGTELEGKPLEHIIHSTYNNGDLLPAFNNAAQAWNHEFFWESMKPGGGGKPSGELLALLERDFTSYEKFYEEFNAAAATQFGAGWAWLAYSNEKLKVVKTPNAVNPLVLGSFPLLTIDVWEHAYYLDFQNRRPDYIKTFMTNLVSWEAVSARLEAAKAASA*
	31	NP_197311	AtCSD3	MEAPRGNLRAVALIAGDNNVRGCLQFVQDISGTTHVTGKISGLSPGFHGFHIHSFGDTTNGCISTGPHFNPLNRVHGPPNEEERHAGDLGNILAGSNGVAEILIKDKHIPLSGQYSILGRAVVVHADPDDLGKGGHKLSKSTGNAGSRVGCGIIGLQSSADAKL*
	32	NP_197722	AtFSD3	MSSCVVTTSCFYTISDSSIRLKSPKLLNLSNQQRRRSLRSRGGLKVEAYYGLKTPPYPLDALEPYMSRRTLEVHWGKHHRGYVDNLNKQLGKDDRLYGYTMEELIKATYNNGNPLPEFNNAAQVYNHDFFWESMQPGGGDTPQKGVLEQIDKDFGSFTNFREKFTNAALTQFGSGWVWLVLKREERRLEVVKTSNAINPLVWDDIPIICVDVWEHSYYLDYKNDRAKYINTFLNHLVSWNAAMSRMARAEAFVNLGEPNIPIA*
	33	NP_199923	AtFSD2	MMNVAVTATPSSLLYSPLLLPSQGPNRRMQWKRNGKRRLGTKVAVSGVITAGFELKPPPYPLDALEPHMSRETLDYHWGKHHKTYVENLNKQILGTDLDALSLEEVVLLSYNKGNMLPAFNNAAQAWNHEFFWESIQPGGGGKPTGELLRLIERDFGSFEEFLERFKSAAASNFGSGWTWLAYKANRLDVANAVNPLPKEEDKKLVIVKTPNAVNPLVWDYSPLLTIDTWEHAYYLDFENRRAEYINTFMEKLVSWETVSTRLESAIARAVQREQEGTETEDEENPDDEVPEVYLDSDIDVSEVD*
Bambox ceiba	34	evm.model.Scaffold431.23	BcMSD1a	MALRSLATRKTLTLGLNSTRLPQYRSLQTFSLPDLTYDYGALEPAISGEIMQLHHQKHHQTYVTNFNKALEQLDEAIQKGDSSTIVKLQSAIKFNGGGHINHSIFWKNLAPINEGGGEPPKASLGWAIDTNFGSFESLIQKISAEGAALQGSGWVWLGLDKELKRLLIETTPNQDPLVTKGPNLVPLLGIDVWEHAYYLQYKNVRPDYLKNIWKVMNWKYASEVYEKESV
	35	evm.model.Scaffold101.63	BcMSD1b	MALRSLASRKTLTLGLNSTRLTHFRALQTLSLPDLPYDYGALEPAISGEIMQLHHQKHHQTYITNYNKALEQLDEAIQKGDSSTVAKLQSTIKFNGGGHINHSIFWKNLAPLCEGGGEPPKGSLGWAIDTNFGSLESLIQKINAEGAALQGSGWVWLGLDKELKKLVIKTTANQDPLVTKGPNLVPLLGIDVWEHAYYLQYKNVRPDYLKNVWKVIDWKYASELYEKESAEAWSP
	36	evm.model.Scaffold63.64	BcFSD1	MTAAISMANTLTLALLPSQGLRGPTRSLPLTNPQRRCLRKSVSNLITAKFELKPPPYPLNALEPNMSRETLEYHWGKHHRTYVENLNKQIVGTELEGLSLEDIVIVSYNNGDILPAFNNAAQAWNHEFFWESMKPGGGGKPSGDLLALIERDFGSFERFIEEFKSAAATQFGSGWAWLAYKANRLNVENAVNPWPSEQDKKLVVVKSPNAVNPLVWDYFPLLTIDVWEHAYYLDFQNRRPDYISMFVEKLVSWEAVSARLEKAKAQAAERELEEERRKKEEEEEKQNDDEAVEMYVDGDTDDSEAE
	37	evm.model.Scaffold65.429	BcFSD2	MACQLLVTDFILPLQSPKISRRSEQRKGSSNGSQKVSTTVAYYGIKKPPYNLDALEPYMSKRALEVHWGIRHRGFVEDLNKQLGKSDILYGYTMDELVIATYNNGNPLPEFNNAAEVWNHDFFWESMQPGGGGMPKLGLLKQIEKDFGSFTNFREKFVEATLTLFGSGWVWLVLKRQERRLAVVKTSNSINPLVWDDIPILNLDMWENDKGKYVNEFLNHLVSWNAAMVRMARAEAFVNLGEPNIPIA
	38	evm.model.Scaffold967.1	BcFSD3	MLRMFSEQRKGSSNGSQKVSTTVAYYGIKKPPYNLDALEPYMSKRALEVHWGIRHRGFVEDLNKQLGKSDILYGYTMDELVIATYNNGNPLPEFNNAAEVWNHDFFWESMQPGGGGMPKLEARRRRLAVVKTSNSINPLVWDDIPILNLDMWEHAYYLDYKNDKGKYVNEFLNHLVSWNAAMVRMARAEAFVNLGEPNIPIA
	39	evm.model.Scaffold502.2	BcMSD2	MALRVATKSQTRNIPRSGRGVLKLDHNHFHPLKTFTLPDLPYDYHELEPVISAEIMEIHHQKHQQTYITNFNRALEQLDRAMSKPDSPTIFKLQSAIKFNGGGHVNHSIFWKNLAPVTKGGGEPPVGALGKAIHTHLGSLERLIDKINLEGAALQGSGWVWLALDKEKELKRLSVETTANQDPLVTKGPP
	40	evm.model.Scaffold52.228	BcCSD1c	MVKAVAVLSSSEGVSGTVFFAQEGDGPTTVTGNVSGLKPGLHGFHVHALGDTTNGCMSTGPHFNPHGKEHGAPEDENRHAGDLGNITAGDDGTASFCITDKQIPLTGSHSIIGRAVVVHADPDDLGKGGHELSKTTGNAGGRVACGIIGLQG
	41	evm.model.Scaffold417.34	BcCSD1a	MVKAVAVLSSSEGVSGTVFFAQEGDGPTTVTGNISGLKPGLHGFHVHALGDTTNGCMSTGPHFNPASKEHGAPDDENRHAGDLGNVTVGDDGMNICLLSTTIPLTGPHSIIGRAVVVHADPDDLGKGGHELSKSTGNAGGRVACGVIGLQG
	42	evm.model.Scaffold89.460	BcCSDc	MDSPTSYQNPSQENGSLPDLLTEYMVDMKCEGCVTAVKNKLQTVNGVKSVEVDLSNQVVRILGSSPVKTMTEALEQIGRKARLIGQGLAEDFLVSAAVAELKGPEIFGVVRFAQVSMELARIEANFSGLLPGKHGWSINEFGDLTRGAASTGKVFNPSNEGTDKKPIGDLGTLDVDNNGEAFYTGVKQQLRVADLIGRSVAVYETEDKSDPGLAAAVIARSAGVGENYKKICACDGTTIWEASDKDFVTSKV
	43	evm.model.Scaffold167.187	BcCSD1b	MVKAVAVLSSSEGVSGTVFFAQEGDGPTTVTGNISGLKPGLHGFHVHALGDTTNGCMSTGPHFNPAGKEHGAPDDENRHAGDLGNVTVGDDGAASFSIIDKQIPLTGPHSIIGRAVVVHADPDDLGKGGHELSKTTGNAGGRVACGIIGLQG
	44	evm.model.Scaffold167.161	BcCSD3	MEGITHVQGKITGLSPGLHGFHIHALGDTTNGCNSTGPHFNPLKKDHGAPSAGERHAGDLGNIIAGHDGVAEVSIKDWQIPLSGQHSILGRAVVVHADPDDLGKGEIFGLYKLQEFASSKSIAKKKDIFLCELVDNLVIL
	45	evm.model.Scaffold145.260	BcCSD2a	MQAAAIAAMAAHAVLATTPFQHTLLFPPLTDPSNPPVLQSSFRGVSLKLHRQSLSIAAAIPKKPFSVVAVTKKAVAVLKGDSKVEGVVTLTQEDGGPTTVNVRVTGLTPGPHGFHLHEFGDTTNGCMSTGAHFNPNKLTHGAPEDEVRHAGDLGNIVANGDGNAFLSFSFFKRKNIPLSGPNAVIGRAFVVHELEDDLGKGGHELSLTTGNAGGRLACGMCTILLSICLYLSRAHKKTGVKKAVGRTRISRLLDIVVLDFDRFAVS
	46	evm.model.Scaffold25.390	BcCSD2b	MAAHAILTTTPSRYTLLSLTPTNPSNHPPVLLSSFRGVSLKLPRRSFSVVATTPKKPFSVLAVTKKAVAVLKGATTVNVRITGLTPGPHGFHLHEYGDTTNGCMSTGAHFNPNNMTHGAPEDEIRHAGDLGNIVANADGRVAEATIVDKQIPLSGPNAVIGRAFVVHELEDDLGKGGHELSLTTGNAGGRLACEGGCSEFRRVWVGQGQIGLKL

## Sheet: Sheet4
Table S4: The information of identified 12 motifs in BcSOD proteins.
Motif name	Motif sequence	width	E-value
Motif1	DGPTTVTGNISGLSPGLHGFHVHELGDTTNGCMSTGPHFNP	41	6.86e-179
Motif2	SIKDKQIPLSGPHSIIGRAVVVHADPDDLGKGG	33	3.91e-179
Motif3	HFRTLATFSLPDPPYDLDALEPYISKEILELHHGKHH	37	3.88e-106
Motif4	KEHGAPEDENRHAGDLGNITAGDDG	25	4.85e-116
Motif5	APMKPGGGEPPKGSLGKAIDTBFGSFESLIZKINAEGAALQGSGWVW	47	1.56e-102
Motif6	LGIDVWEHAYYLDYKNVRPDY	21	3.07e-122
Motif7	QTYITNFNKALEQLDEAIQKGDSSTIVKLQSAIKFNGGGHINHSIFWKNL	50	2.16e-130
Motif8	HELSKTTGNAGGRVAC	16	5.57e-124
Motif9	KAVAVLSSSEGVSGTVFFAQE	21	3.23e-21
Motif10	VVKTTNNQBPLVTDG	15	4.25e-131
Motif11	EFVNKLVSWKAASVRYEKAE	20	1.79e-78
Motif12	AAEVWNHDFFW	11	6.2e-99

## Sheet: Sheet5
Table S5: Information of protein–protein interactions of BcSODs.
queryIndex	query Item	string Id	Identity (%)	bitscore	homologous SOD in A. thaliana	annotation
1	BcMSD1a	3702.O81235	77.8	383.3	MSD1	Superoxide dismutase [Mn] 1, mitochondrial; Destroys superoxide anion radicals which are normally produced within the cells and which are toxic to biological systems; Belongs to the iron/manganese superoxide dismutase family.
2	BcMSD1b	3702.O81235	79.6	388.3	MSD1	Superoxide dismutase [Mn] 1, mitochondrial; Destroys superoxide anion radicals which are normally produced within the cells and which are toxic to biological systems; Belongs to the iron/manganese superoxide dismutase family.
3	BcFSD1	3702.P21276	69.3	334.3	FSD1	Superoxide dismutase [Fe] 1, chloroplastic; Destroys superoxide anion radicals which are normally produced within the cells and which are toxic to biological systems.
4	BcFSD2	3702.Q9LU64	43.9	228.8	FSD2	Superoxide dismutase [Fe] 2, chloroplastic; Destroys superoxide anion radicals which are normally produced within the cells and which are toxic to biological systems (By similarity). Plays important role in chloroplast development, particularly in the maintenance of thylakoids membranes. Seems to act as a heterodimer with FSD3.
5	BcFSD3	3702.Q9FMX0	62.7	307	FSD3	Superoxide dismutase [Fe] 3, chloroplastic; Destroys superoxide anion radicals which are normally produced within the cells and which are toxic to biological systems (By similarity). Plays important role in chloroplast development, particularly in the maintenance of thylakoids membranes. Seems to act as a heterodimer with FSD2; Belongs to the iron/manganese superoxide dismutase family.
6	BcMSD2	3702.Q9LYK8	67.5	219.5	MSD2	Superoxide dismutase [Mn] 2, mitochondrial; Destroys superoxide anion radicals which are normally produced within the cells and which are toxic to biological systems.
7	BcCSD1c	3702.P24704	86.2	271.2	CSD1	Superoxide dismutase [Cu-Zn] 1; Destroys radicals which are normally produced within the cells and which are toxic to biological systems; Belongs to the Cu-Zn superoxide dismutase family.
8	BcCSD1a	3702.P24704	79.6	252.7	CSD1	Superoxide dismutase [Cu-Zn] 1; Destroys radicals which are normally produced within the cells and which are toxic to biological systems; Belongs to the Cu-Zn superoxide dismutase family.
9	BcCSDc	3702.Q9LD47	73.5	371.7	CSDc	Copper chaperone for superoxide dismutase, chloroplastic/cytosolic; Copper chaperone for the superoxide dismutases CSD1, CSD2 and CSD3. Binds copper ions and delivers them specifically to CSDs. Is required for assistance in CSDs disulfide bond formation and thereby activation of CSDs. May be involved in the negative regulation of heat stress-responsive genes and thermotolerance.
10	BcCSD1b	3702.P24704	84.2	270.4	CSD1	Superoxide dismutase [Cu-Zn] 1; Destroys radicals which are normally produced within the cells and which are toxic to biological systems; Belongs to the Cu-Zn superoxide dismutase family.
11	BcCSD3	3702.Q9FK60	77.1	175.6	CSD3	Superoxide dismutase [Cu-Zn] 3; Destroys radicals which are normally produced within the cells and which are toxic to biological systems.
12	BcCSD2a	3702.O78310	57.4	221.1	CSD2	Superoxide dismutase [Cu-Zn] 2, chloroplastic; Destroys radicals which are normally produced within the cells and which are toxic to biological systems. Mediates tolerance to stress, including photo-oxidative stress.
13	BcCSD2b	3702.O78310	72.1	225.7	CSD2	Superoxide dismutase [Cu-Zn] 2, chloroplastic; Destroys radicals which are normally produced within the cells and which are toxic to biological systems. Mediates tolerance to stress, including photo-oxidative stress.

## Sheet: Sheet6
Table S6: Information of hormone- and stress-related cis-elements detected in the promoters regions of BcSODs.								0.461538
Gene name	Gene ID	cis element	sequence	position	length	strand	plant source	cis element name
BcMSD1b	evm.model.Scaffold101.63	ABRE	ACGTG	743	5	-	Arabidopsis thaliana	cis-acting element involved in the abscisic acid responsiveness
BcMSD1b	evm.model.Scaffold101.63	ABRE	ACGTG	795	5	+	Arabidopsis thaliana	cis-acting element involved in the abscisic acid responsiveness
BcMSD1b	evm.model.Scaffold101.63	ABRE	ACGTG	1932	5	+	Arabidopsis thaliana	cis-acting element involved in the abscisic acid responsiveness
BcMSD1b	evm.model.Scaffold101.63	ABRE	GACACGTGGC	2630	9	-	Triticum aestivum	cis-acting element involved in the abscisic acid responsiveness
BcMSD1b	evm.model.Scaffold101.63	ABRE	ACGTG	2734	5	-	Arabidopsis thaliana	cis-acting element involved in the abscisic acid responsiveness
BcMSD1b	evm.model.Scaffold101.63	ARE	AAACCA	173	6	+	Zea mays	cis-acting regulatory element essential for the anaerobic induction
BcMSD1b	evm.model.Scaffold101.63	ARE	AAACCA	561	6	+	Zea mays	cis-acting regulatory element essential for the anaerobic induction
BcMSD1b	evm.model.Scaffold101.63	ARE	AAACCA	907	6	-	Zea mays	cis-acting regulatory element essential for the anaerobic induction
BcMSD1b	evm.model.Scaffold101.63	ARE	AAACCA	1069	6	+	Zea mays	cis-acting regulatory element essential for the anaerobic induction
BcMSD1b	evm.model.Scaffold101.63	ARE	AAACCA	1746	6	+	Zea mays	cis-acting regulatory element essential for the anaerobic induction
BcMSD1b	evm.model.Scaffold101.63	ARE	AAACCA	1762	6	+	Zea mays	cis-acting regulatory element essential for the anaerobic induction
BcMSD1b	evm.model.Scaffold101.63	TGA-element	AACGAC	1619	6	-	Brassica oleracea	auxin-responsive element
BcMSD1b	evm.model.Scaffold101.63	DRE	TACCGACAT	201	9	+	Arabidopsis thaliana	cis-acting element involved in dehydration, low-temp, salt stresses
BcMSD1b	evm.model.Scaffold101.63	GARE-motif	TCTGTTG	238	7	+	Brassica oleracea	gibberellin-responsive element
BcMSD1b	evm.model.Scaffold101.63	GARE-motif	TCTGTTG	1143	7	+	Brassica oleracea	gibberellin-responsive element
BcMSD1b	evm.model.Scaffold101.63	P-box	CCTTTTG	1709	7	+	Oryza sativa	gibberellin-responsive element
BcMSD1b	evm.model.Scaffold101.63	TATC-box	TATCCCA	1946	7	+	Oryza sativa	cis-acting element involved in gibberellin-responsiveness
BcMSD1b	evm.model.Scaffold101.63	ACE	GACACGTATG	792	9	-	Petroselinum crispum	cis-acting element involved in light responsiveness
BcMSD1b	evm.model.Scaffold101.63	ACE	CTAACGTATT	1922	9	+	Petroselinum crispum	cis-acting element involved in light responsiveness
BcMSD1b	evm.model.Scaffold101.63	Box 4	ATTAAT	2566	6	-	Petroselinum crispum	part of a conserved DNA module involved in light responsiveness
BcMSD1b	evm.model.Scaffold101.63	Box 4	ATTAAT	2821	6	-	Petroselinum crispum	part of a conserved DNA module involved in light responsiveness
BcMSD1b	evm.model.Scaffold101.63	GATA-motif	AAGATAAGATT	1683	10	-	Arabidopsis thaliana	part of a light responsive element
BcMSD1b	evm.model.Scaffold101.63	G-box	CACGTC	743	6	+	Zea mays	cis-acting regulatory element involved in light responsiveness
BcMSD1b	evm.model.Scaffold101.63	G-box	TACGTG	794	6	+	Arabidopsis thaliana	cis-acting regulatory element involved in light responsiveness
BcMSD1b	evm.model.Scaffold101.63	G-box	TACGTG	1931	6	+	Arabidopsis thaliana	cis-acting regulatory element involved in light responsiveness
BcMSD1b	evm.model.Scaffold101.63	G-box	tgACACGTGGCA	2629	11	-	Lycopersicon esculentum	cis-acting regulatory element involved in light responsiveness
BcMSD1b	evm.model.Scaffold101.63	G-Box	CACGTT	2734	6	+	Pisum sativum	cis-acting regulatory element involved in light responsiveness
BcMSD1b	evm.model.Scaffold101.63	GT1-motif	GGTTAA	952	6	+	Arabidopsis thaliana	light responsive element
BcMSD1b	evm.model.Scaffold101.63	TCCC-motif	TCTCCCT	418	7	+	Spinacia oleracea	part of a light responsive element
BcMSD1b	evm.model.Scaffold101.63	TCCC-motif	TCTCCCT	696	7	+	Spinacia oleracea	part of a light responsive element
BcMSD1b	evm.model.Scaffold101.63	TCT-motif	TCTTAC	2059	6	+	Arabidopsis thaliana	part of a light responsive element
BcMSD1b	evm.model.Scaffold101.63	TCT-motif	TCTTAC	2957	6	+	Arabidopsis thaliana	part of a light responsive element
BcMSD1b	evm.model.Scaffold101.63	CAT-box	GCCACT	327	6	+	Arabidopsis thaliana	cis-acting regulatory element related to meristem expression
BcMSD1b	evm.model.Scaffold101.63	TCA-element	CCATCTTTTT	1413	9	-	Nicotiana tabacum	cis-acting element involved in salicylic acid responsiveness
BcMSD1b	evm.model.Scaffold101.63	TCA-element	CCATCTTTTT	1988	9	+	Nicotiana tabacum	cis-acting element involved in salicylic acid responsiveness
BcMSD1b	evm.model.Scaffold101.63	RY-element	CATGCATG	1287	8	+	Helianthus annuus	cis-acting regulatory element involved in seed-specific regulation
BcMSD1b	evm.model.Scaffold101.63	O2-site	GATGA(C/T)(A/G)TG(A/G)	2267	8	+	Zea mays	cis-acting regulatory element involved in zein metabolism regulation
BcCSD2a	evm.model.Scaffold145.260	ABRE	GCAACGTGTC	791	9	-	Hordeum vulgare	cis-acting element involved in the abscisic acid responsiveness
BcCSD2a	evm.model.Scaffold145.260	ABRE	ACGTG	988	5	-	Arabidopsis thaliana	cis-acting element involved in the abscisic acid responsiveness
BcCSD2a	evm.model.Scaffold145.260	ABRE	ACGTG	1364	5	-	Arabidopsis thaliana	cis-acting element involved in the abscisic acid responsiveness
BcCSD2a	evm.model.Scaffold145.260	ARE	AAACCA	246	6	-	Zea mays	cis-acting regulatory element essential for the anaerobic induction
BcCSD2a	evm.model.Scaffold145.260	ARE	AAACCA	448	6	+	Zea mays	cis-acting regulatory element essential for the anaerobic induction
BcCSD2a	evm.model.Scaffold145.260	ARE	AAACCA	1129	6	-	Zea mays	cis-acting regulatory element essential for the anaerobic induction
BcCSD2a	evm.model.Scaffold145.260	ARE	AAACCA	2801	6	+	Zea mays	cis-acting regulatory element essential for the anaerobic induction
BcCSD2a	evm.model.Scaffold145.260	circadian	CAAAGATATC	1050	9	-	Lycopersicon esculentum	cis-acting regulatory element involved in circadian control
BcCSD2a	evm.model.Scaffold145.260	TC-rich repeats	ATTCTCTAAC	995	9	-	Nicotiana tabacum	cis-acting element involved in defense and stress responsiveness
BcCSD2a	evm.model.Scaffold145.260	MBS	CAACTG	1572	6	+	Arabidopsis thaliana	MYB binding site involved in drought-inducibility
BcCSD2a	evm.model.Scaffold145.260	AT1-motif	AATTATTTTTTATT	494	13	-	Solanum tuberosum	part of a light responsive module
BcCSD2a	evm.model.Scaffold145.260	Box 4	ATTAAT	198	6	+	Petroselinum crispum	part of a conserved DNA module involved in light responsiveness
BcCSD2a	evm.model.Scaffold145.260	Box 4	ATTAAT	620	6	+	Petroselinum crispum	part of a conserved DNA module involved in light responsiveness
BcCSD2a	evm.model.Scaffold145.260	Box 4	ATTAAT	745	6	+	Petroselinum crispum	part of a conserved DNA module involved in light responsiveness
BcCSD2a	evm.model.Scaffold145.260	Box 4	ATTAAT	874	6	+	Petroselinum crispum	part of a conserved DNA module involved in light responsiveness
BcCSD2a	evm.model.Scaffold145.260	Box 4	ATTAAT	1496	6	+	Petroselinum crispum	part of a conserved DNA module involved in light responsiveness
BcCSD2a	evm.model.Scaffold145.260	Box 4	ATTAAT	1890	6	-	Petroselinum crispum	part of a conserved DNA module involved in light responsiveness
BcCSD2a	evm.model.Scaffold145.260	Box 4	ATTAAT	1939	6	-	Petroselinum crispum	part of a conserved DNA module involved in light responsiveness
BcCSD2a	evm.model.Scaffold145.260	Box 4	ATTAAT	2077	6	-	Petroselinum crispum	part of a conserved DNA module involved in light responsiveness
BcCSD2a	evm.model.Scaffold145.260	Box 4	ATTAAT	2194	6	-	Petroselinum crispum	part of a conserved DNA module involved in light responsiveness
BcCSD2a	evm.model.Scaffold145.260	Box 4	ATTAAT	2226	6	-	Petroselinum crispum	part of a conserved DNA module involved in light responsiveness
BcCSD2a	evm.model.Scaffold145.260	Box 4	ATTAAT	2613	6	-	Petroselinum crispum	part of a conserved DNA module involved in light responsiveness
BcCSD2a	evm.model.Scaffold145.260	Gap-box	CAAATGAA(A/G)A	1321	9.5	-	Arabidopsis thaliana	part of a light responsive element
BcCSD2a	evm.model.Scaffold145.260	GATA-motif	AAGGATAAGG	1025	9	+	Solanum tuberosum	part of a light responsive element
BcCSD2a	evm.model.Scaffold145.260	GATA-motif	GATAGGA	2136	7	+	Arabidopsis thaliana	part of a light responsive element
BcCSD2a	evm.model.Scaffold145.260	GATA-motif	GATAGGA	2842	7	+	Arabidopsis thaliana	part of a light responsive element
BcCSD2a	evm.model.Scaffold145.260	G-box	TACGTG	988	6	-	Arabidopsis thaliana	cis-acting regulatory element involved in light responsiveness
BcCSD2a	evm.model.Scaffold145.260	G-box	CACGTC	1364	6	+	Zea mays	cis-acting regulatory element involved in light responsiveness
BcCSD2a	evm.model.Scaffold145.260	I-box	AAGATAAGGCT	1615	10	+	Gossypium hirsutum	part of a light responsive element
BcCSD2a	evm.model.Scaffold145.260	LAMP-element	CTTTATCA	866	8	+	Pisum sativum	part of a light responsive element
BcCSD2a	evm.model.Scaffold145.260	MRE	AACCTAA	2180	7	+	Petroselinum crispum	MYB binding site involved in light responsiveness
BcCSD2a	evm.model.Scaffold145.260	TCT-motif	TCTTAC	125	6	+	Arabidopsis thaliana	part of a light responsive element
BcCSD2a	evm.model.Scaffold145.260	TCT-motif	TCTTAC	757	6	+	Arabidopsis thaliana	part of a light responsive element
BcCSD2a	evm.model.Scaffold145.260	TCT-motif	TCTTAC	1099	6	-	Arabidopsis thaliana	part of a light responsive element
BcCSD2a	evm.model.Scaffold145.260	CGTCA-motif	CGTCA	1366	5	+	Hordeum vulgare	cis-acting regulatory element involved in the MeJA-responsiveness
BcCSD2a	evm.model.Scaffold145.260	TGACG-motif	TGACG	1366	5	-	Hordeum vulgare	cis-acting regulatory element involved in the MeJA-responsiveness
BcCSD2a	evm.model.Scaffold145.260	TCA-element	CCATCTTTTT	1224	9	-	Nicotiana tabacum	cis-acting element involved in salicylic acid responsiveness
BcCSD2a	evm.model.Scaffold145.260	RY-element	CATGCATG	1763	8	-	Helianthus annuus	cis-acting regulatory element involved in seed-specific regulation
BcCSD2a	evm.model.Scaffold145.260	O2-site	GTTGACGTGA	1363	9	-	Zea mays	cis-acting regulatory element involved in zein metabolism regulation
BcCSD2a	evm.model.Scaffold145.260	O2-site	GATGATGTGG	2721	9	-	Zea mays	cis-acting regulatory element involved in zein metabolism regulation
BcCSD2a	evm.model.Scaffold145.260	Nodule-site1	GATATATTAATATTTTATTTTATA	1926	22	-	Glycine max	nodule specific factor binding site
BcCSD3	evm.model.Scaffold167.161	ABRE	ACGTG	925	5	+	Arabidopsis thaliana	cis-acting element involved in the abscisic acid responsiveness
BcCSD3	evm.model.Scaffold167.161	ABRE	ACGTG	990	5	-	Arabidopsis thaliana	cis-acting element involved in the abscisic acid responsiveness
BcCSD3	evm.model.Scaffold167.161	ARE	AAACCA	2777	6	+	Zea mays	cis-acting regulatory element essential for the anaerobic induction
BcCSD3	evm.model.Scaffold167.161	TGA-element	AACGAC	960	6	-	Brassica oleracea	auxin-responsive element
BcCSD3	evm.model.Scaffold167.161	TC-rich repeats	ATTCTCTAAC	1992	9	-	Nicotiana tabacum	cis-acting element involved in defense and stress responsiveness
BcCSD3	evm.model.Scaffold167.161	MBS	CAACTG	1454	6	+	Arabidopsis thaliana	MYB binding site involved in drought-inducibility
BcCSD3	evm.model.Scaffold167.161	P-box	CCTTTTG	205	7	-	Oryza sativa	gibberellin-responsive element
BcCSD3	evm.model.Scaffold167.161	AT1-motif	AATTATTTTTTATT	1192	13	+	Solanum tuberosum	part of a light responsive module
BcCSD3	evm.model.Scaffold167.161	ATCT-motif	AATCTAATCC	2795	9	+	Pisum sativum	part of a conserved DNA module involved in light responsiveness
BcCSD3	evm.model.Scaffold167.161	Box 4	ATTAAT	1171	6	+	Petroselinum crispum	part of a conserved DNA module involved in light responsiveness
BcCSD3	evm.model.Scaffold167.161	Box 4	ATTAAT	1209	6	+	Petroselinum crispum	part of a conserved DNA module involved in light responsiveness
BcCSD3	evm.model.Scaffold167.161	Box 4	ATTAAT	1368	6	+	Petroselinum crispum	part of a conserved DNA module involved in light responsiveness
BcCSD3	evm.model.Scaffold167.161	Box 4	ATTAAT	1392	6	+	Petroselinum crispum	part of a conserved DNA module involved in light responsiveness
BcCSD3	evm.model.Scaffold167.161	Box 4	ATTAAT	2682	6	-	Petroselinum crispum	part of a conserved DNA module involved in light responsiveness
BcCSD3	evm.model.Scaffold167.161	Box 4	ATTAAT	2712	6	-	Petroselinum crispum	part of a conserved DNA module involved in light responsiveness
BcCSD3	evm.model.Scaffold167.161	Box 4	ATTAAT	2908	6	-	Petroselinum crispum	part of a conserved DNA module involved in light responsiveness
BcCSD3	evm.model.Scaffold167.161	Box II	ACACGTAGA	922	9	-	Arabidopsis thaliana	part of a light responsive element
BcCSD3	evm.model.Scaffold167.161	GA-motif	ATAGATAA	213	8	+	Arabidopsis thaliana	part of a light responsive element
BcCSD3	evm.model.Scaffold167.161	G-box	TAACACGTAG	923	10	-	Brassica oleracea	cis-acting regulatory element involved in light responsiveness
BcCSD3	evm.model.Scaffold167.161	G-box	TACGTG	924	6	+	Arabidopsis thaliana	cis-acting regulatory element involved in light responsiveness
BcCSD3	evm.model.Scaffold167.161	G-Box	CACGTT	990	6	+	Pisum sativum	cis-acting regulatory element involved in light responsiveness
BcCSD3	evm.model.Scaffold167.161	I-box	TAGATAACC	214	9	+	Pisum sativum	part of a light responsive element
BcCSD3	evm.model.Scaffold167.161	CAT-box	GCCACT	2209	6	-	Arabidopsis thaliana	cis-acting regulatory element related to meristem expression
BcCSD1b	evm.model.Scaffold167.187	ABRE	ACGTG	319	5	-	Arabidopsis thaliana	cis-acting element involved in the abscisic acid responsiveness
BcCSD1b	evm.model.Scaffold167.187	ABRE	ACGTG	2404	5	-	Arabidopsis thaliana	cis-acting element involved in the abscisic acid responsiveness
BcCSD1b	evm.model.Scaffold167.187	TGA-element	AACGAC	2754	6	-	Brassica oleracea	auxin-responsive element
BcCSD1b	evm.model.Scaffold167.187	MSA-like	TCAAACGGT	2047	9	+	Catharanthus roseus	cis-acting element involved in cell cycle regulation
BcCSD1b	evm.model.Scaffold167.187	circadian	CAAAGATATC	89	9	-	Lycopersicon esculentum	cis-acting regulatory element involved in circadian control
BcCSD1b	evm.model.Scaffold167.187	G-box	CACGTC	319	6	+	Zea mays	cis-acting regulatory element involved in light responsiveness
BcCSD1b	evm.model.Scaffold167.187	TC-rich repeats	GTTTTCTTAC	432	9	-	Nicotiana tabacum	cis-acting element involved in defense and stress responsiveness
BcCSD1b	evm.model.Scaffold167.187	MBS	CAACTG	292	6	+	Arabidopsis thaliana	MYB binding site involved in drought-inducibility
BcCSD1b	evm.model.Scaffold167.187	MBS	CAACTG	787	6	-	Arabidopsis thaliana	MYB binding site involved in drought-inducibility
BcCSD1b	evm.model.Scaffold167.187	MBS	CAACTG	1237	6	-	Arabidopsis thaliana	MYB binding site involved in drought-inducibility
BcCSD1b	evm.model.Scaffold167.187	P-box	CCTTTTG	66	7	+	Oryza sativa	gibberellin-responsive element
BcCSD1b	evm.model.Scaffold167.187	TATC-box	TATCCCA	1475	7	+	Oryza sativa	cis-acting element involved in gibberellin-responsiveness
BcCSD1b	evm.model.Scaffold167.187	ACE	CTAACGTATT	675	9	+	Petroselinum crispum	cis-acting element involved in light responsiveness
BcCSD1b	evm.model.Scaffold167.187	Box 4	ATTAAT	1853	6	-	Petroselinum crispum	part of a conserved DNA module involved in light responsiveness
BcCSD1b	evm.model.Scaffold167.187	Box 4	ATTAAT	1913	6	-	Petroselinum crispum	part of a conserved DNA module involved in light responsiveness
BcCSD1b	evm.model.Scaffold167.187	Box 4	ATTAAT	2783	6	-	Petroselinum crispum	part of a conserved DNA module involved in light responsiveness
BcCSD1b	evm.model.Scaffold167.187	CAG-motif	GAAAGGCAGAC	814	10	-	Arabidopsis thaliana	part of a light response element
BcCSD1b	evm.model.Scaffold167.187	chs-CMA1a	TTACTTAA	1757	8	+	Daucus carota	part of a light responsive element
BcCSD1b	evm.model.Scaffold167.187	G-box	CACGAC	743	6	-	Zea mays	cis-acting regulatory element involved in light responsiveness
BcCSD1b	evm.model.Scaffold167.187	G-Box	CACGTT	2404	6	+	Pisum sativum	cis-acting regulatory element involved in light responsiveness
BcCSD1b	evm.model.Scaffold167.187	GT1-motif	GGTTAA	1202	6	+	Arabidopsis thaliana	light responsive element
BcCSD1b	evm.model.Scaffold167.187	I-box	cCATATCCAAT	1097	10	+	Flaveria trinervia	part of a light responsive element
BcCSD1b	evm.model.Scaffold167.187	TCCC-motif	TCTCCCT	815	7	+	Spinacia oleracea	part of a light responsive element
BcCSD1b	evm.model.Scaffold167.187	LTR	CCGAAA	412	6	-	Hordeum vulgare	cis-acting element involved in low-temperature responsiveness
BcCSD1b	evm.model.Scaffold167.187	LTR	CCGAAA	1088	6	-	Hordeum vulgare	cis-acting element involved in low-temperature responsiveness
BcCSD1b	evm.model.Scaffold167.187	CGTCA-motif	CGTCA	782	5	-	Hordeum vulgare	cis-acting regulatory element involved in the MeJA-responsiveness
BcCSD1b	evm.model.Scaffold167.187	TGACG-motif	TGACG	782	5	+	Hordeum vulgare	cis-acting regulatory element involved in the MeJA-responsiveness
BcCSD1b	evm.model.Scaffold167.187	TCA-element	CCATCTTTTT	2390	9	+	Nicotiana tabacum	cis-acting element involved in salicylic acid responsiveness
BcCSD1b	evm.model.Scaffold167.187	TCA-element	CCATCTTTTT	2928	9	+	Nicotiana tabacum	cis-acting element involved in salicylic acid responsiveness
BcCSD1b	evm.model.Scaffold167.187	WUN-motif	AAATTTCCT	1597	9	+	Brassica oleracea	wound-responsive element
BcCSD1b	evm.model.Scaffold167.187	O2-site	GATGACATGG	278	9	+	Zea mays	cis-acting regulatory element involved in zein metabolism regulation
BcCSD1b	evm.model.Scaffold167.187	O2-site	GTTGACGTGA	318	9	-	Zea mays	cis-acting regulatory element involved in zein metabolism regulation
BcCSD1b	evm.model.Scaffold167.187	CCAAT-box	CAACGG	103	6	+	Hordeum vulgare	MYBHv1 binding site
BcCSD2b	evm.model.Scaffold25.390	ABRE	ACGTG	1923	5	-	Arabidopsis thaliana	cis-acting element involved in the abscisic acid responsiveness
BcCSD2b	evm.model.Scaffold25.390	ARE	AAACCA	583	6	-	Zea mays	cis-acting regulatory element essential for the anaerobic induction
BcCSD2b	evm.model.Scaffold25.390	ARE	AAACCA	860	6	+	Zea mays	cis-acting regulatory element essential for the anaerobic induction
BcCSD2b	evm.model.Scaffold25.390	ARE	AAACCA	1694	6	-	Zea mays	cis-acting regulatory element essential for the anaerobic induction
BcCSD2b	evm.model.Scaffold25.390	AuxRR-core	GGTCCAT	1780	7	-	Nicotiana tabacum	cis-acting regulatory element involved in auxin responsiveness
BcCSD2b	evm.model.Scaffold25.390	TC-rich repeats	GTTTTCTTAC	979	9	+	Nicotiana tabacum	cis-acting element involved in defense and stress responsiveness
BcCSD2b	evm.model.Scaffold25.390	HD-Zip 1	CAAT(A/T)ATTG	2330	8.5	-	Arabidopsis thaliana	element involved in differentiation of the palisade mesophyll cells
BcCSD2b	evm.model.Scaffold25.390	MBS	CAACTG	537	6	-	Arabidopsis thaliana	MYB binding site involved in drought-inducibility
BcCSD2b	evm.model.Scaffold25.390	MBS	CAACTG	765	6	+	Arabidopsis thaliana	MYB binding site involved in drought-inducibility
BcCSD2b	evm.model.Scaffold25.390	MBS	CAACTG	2990	6	+	Arabidopsis thaliana	MYB binding site involved in drought-inducibility
BcCSD2b	evm.model.Scaffold25.390	P-box	CCTTTTG	749	7	+	Oryza sativa	gibberellin-responsive element
BcCSD2b	evm.model.Scaffold25.390	P-box	CCTTTTG	2155	7	-	Oryza sativa	gibberellin-responsive element
BcCSD2b	evm.model.Scaffold25.390	AE-box	AGAAACAA	410	8	+	Arabidopsis thaliana	part of a module for light response
BcCSD2b	evm.model.Scaffold25.390	AE-box	AGAAACAA	2356	8	+	Arabidopsis thaliana	part of a module for light response
BcCSD2b	evm.model.Scaffold25.390	AE-box	AGAAACAA	2405	8	+	Arabidopsis thaliana	part of a module for light response
BcCSD2b	evm.model.Scaffold25.390	Box 4	ATTAAT	1002	6	+	Petroselinum crispum	part of a conserved DNA module involved in light responsiveness
BcCSD2b	evm.model.Scaffold25.390	Box 4	ATTAAT	1633	6	-	Petroselinum crispum	part of a conserved DNA module involved in light responsiveness
BcCSD2b	evm.model.Scaffold25.390	Box 4	ATTAAT	2676	6	-	Petroselinum crispum	part of a conserved DNA module involved in light responsiveness
BcCSD2b	evm.model.Scaffold25.390	GATA-motif	AAGGATAAGG	248	9	+	Solanum tuberosum	part of a light responsive element
BcCSD2b	evm.model.Scaffold25.390	G-box	CACGTC	1923	6	+	Zea mays	cis-acting regulatory element involved in light responsiveness
BcCSD2b	evm.model.Scaffold25.390	GT1-motif	GGTTAAT	758	7	+	Avena sativa	light responsive element
BcCSD2b	evm.model.Scaffold25.390	I-box	gGATAAGGTG	1375	9	-	Zea mays	part of a light responsive element
BcCSD2b	evm.model.Scaffold25.390	LAMP-element	CCTTATCCA	249	9	-	Spinacia oleracea	part of a light responsive element
BcCSD2b	evm.model.Scaffold25.390	TCT-motif	TCTTAC	638	6	+	Arabidopsis thaliana	part of a light responsive element
BcCSD2b	evm.model.Scaffold25.390	LTR	CCGAAA	63	6	-	Hordeum vulgare	cis-acting element involved in low-temperature responsiveness
BcCSD2b	evm.model.Scaffold25.390	LTR	CCGAAA	1471	6	-	Hordeum vulgare	cis-acting element involved in low-temperature responsiveness
BcCSD2b	evm.model.Scaffold25.390	LTR	CCGAAA	2972	6	-	Hordeum vulgare	cis-acting element involved in low-temperature responsiveness
BcCSD2b	evm.model.Scaffold25.390	CGTCA-motif	CGTCA	1583	5	+	Hordeum vulgare	cis-acting regulatory element involved in the MeJA-responsiveness
BcCSD2b	evm.model.Scaffold25.390	TGACG-motif	TGACG	1583	5	-	Hordeum vulgare	cis-acting regulatory element involved in the MeJA-responsiveness
BcCSD1a	evm.model.Scaffold417.34	ABRE	ACGTG	1038	5	-	Arabidopsis thaliana	cis-acting element involved in the abscisic acid responsiveness
BcCSD1a	evm.model.Scaffold417.34	ABRE	TACGGTC	1311	7	+	Arabidopsis thaliana	cis-acting element involved in the abscisic acid responsiveness
BcCSD1a	evm.model.Scaffold417.34	ABRE	ACGTG	1370	5	-	Arabidopsis thaliana	cis-acting element involved in the abscisic acid responsiveness
BcCSD1a	evm.model.Scaffold417.34	MBSI	aaaAaaC(G/C)GTTA	2250	11	-	Petunia hybrida	MYB binding site involved in flavonoid biosynthetic genes regulation
BcCSD1a	evm.model.Scaffold417.34	P-box	CCTTTTG	2875	7	+	Oryza sativa	gibberellin-responsive element
BcCSD1a	evm.model.Scaffold417.34	AT1-motif	AATTATTTTTTATT	1017	13	-	Solanum tuberosum	part of a light responsive module
BcCSD1a	evm.model.Scaffold417.34	AT1-motif	AATTATTTTTTATT	1708	13	+	Solanum tuberosum	part of a light responsive module
BcCSD1a	evm.model.Scaffold417.34	Box 4	ATTAAT	733	6	+	Petroselinum crispum	part of a conserved DNA module involved in light responsiveness
BcCSD1a	evm.model.Scaffold417.34	Box 4	ATTAAT	998	6	+	Petroselinum crispum	part of a conserved DNA module involved in light responsiveness
BcCSD1a	evm.model.Scaffold417.34	Box 4	ATTAAT	1005	6	+	Petroselinum crispum	part of a conserved DNA module involved in light responsiveness
BcCSD1a	evm.model.Scaffold417.34	Box 4	ATTAAT	1185	6	+	Petroselinum crispum	part of a conserved DNA module involved in light responsiveness
BcCSD1a	evm.model.Scaffold417.34	Box 4	ATTAAT	1219	6	+	Petroselinum crispum	part of a conserved DNA module involved in light responsiveness
BcCSD1a	evm.model.Scaffold417.34	Box 4	ATTAAT	1455	6	+	Petroselinum crispum	part of a conserved DNA module involved in light responsiveness
BcCSD1a	evm.model.Scaffold417.34	Box 4	ATTAAT	1514	6	-	Petroselinum crispum	part of a conserved DNA module involved in light responsiveness
BcCSD1a	evm.model.Scaffold417.34	Box 4	ATTAAT	1609	6	-	Petroselinum crispum	part of a conserved DNA module involved in light responsiveness
BcCSD1a	evm.model.Scaffold417.34	Box 4	ATTAAT	1649	6	-	Petroselinum crispum	part of a conserved DNA module involved in light responsiveness
BcCSD1a	evm.model.Scaffold417.34	Box 4	ATTAAT	1719	6	-	Petroselinum crispum	part of a conserved DNA module involved in light responsiveness
BcCSD1a	evm.model.Scaffold417.34	Box 4	ATTAAT	2796	6	-	Petroselinum crispum	part of a conserved DNA module involved in light responsiveness
BcCSD1a	evm.model.Scaffold417.34	chs-CMA2a	TCACTTGA	285	8	-	Petroselinum crispum	part of a light responsive element
BcCSD1a	evm.model.Scaffold417.34	GATA-motif	AAGATAAGATT	2131	10	+	Arabidopsis thaliana	part of a light responsive element
BcCSD1a	evm.model.Scaffold417.34	G-box	TACGTG	1038	6	-	Arabidopsis thaliana	cis-acting regulatory element involved in light responsiveness
BcCSD1a	evm.model.Scaffold417.34	G-box	CACGTC	1370	6	+	Zea mays	cis-acting regulatory element involved in light responsiveness
BcCSD1a	evm.model.Scaffold417.34	I-box	AAGATAAGGCT	1837	10	-	Gossypium hirsutum	part of a light responsive element
BcCSD1a	evm.model.Scaffold417.34	I-box	AAGATAAGGCT	2131	10	+	Gossypium hirsutum	part of a light responsive element
BcCSD1a	evm.model.Scaffold417.34	I-box	AGATAAGG	2132	8	+	Triticum aestivum	part of a light responsive element
BcCSD1a	evm.model.Scaffold417.34	MRE	AACCTAA	1944	7	-	Petroselinum crispum	MYB binding site involved in light responsiveness
BcCSD1a	evm.model.Scaffold417.34	TCT-motif	TCTTAC	2129	6	-	Arabidopsis thaliana	part of a light responsive element
BcCSD1a	evm.model.Scaffold417.34	LTR	CCGAAA	878	6	+	Hordeum vulgare	cis-acting element involved in low-temperature responsiveness
BcCSD1a	evm.model.Scaffold417.34	CGTCA-motif	CGTCA	1372	5	+	Hordeum vulgare	cis-acting regulatory element involved in the MeJA-responsiveness
BcCSD1a	evm.model.Scaffold417.34	CGTCA-motif	CGTCA	1823	5	+	Hordeum vulgare	cis-acting regulatory element involved in the MeJA-responsiveness
BcCSD1a	evm.model.Scaffold417.34	CGTCA-motif	CGTCA	2927	5	+	Hordeum vulgare	cis-acting regulatory element involved in the MeJA-responsiveness
BcCSD1a	evm.model.Scaffold417.34	TGACG-motif	TGACG	1372	5	-	Hordeum vulgare	cis-acting regulatory element involved in the MeJA-responsiveness
BcCSD1a	evm.model.Scaffold417.34	TGACG-motif	TGACG	1823	5	-	Hordeum vulgare	cis-acting regulatory element involved in the MeJA-responsiveness
BcCSD1a	evm.model.Scaffold417.34	TGACG-motif	TGACG	2927	5	-	Hordeum vulgare	cis-acting regulatory element involved in the MeJA-responsiveness
BcCSD1a	evm.model.Scaffold417.34	O2-site	GTTGACGTGA	1369	9	-	Zea mays	cis-acting regulatory element involved in zein metabolism regulation
BcCSD1a	evm.model.Scaffold417.34	O2-site	GATGATGTGG	2843	10	+	Zea mays	cis-acting regulatory element involved in zein metabolism regulation
BcMSD1a	evm.model.Scaffold431.23	ABRE	ACGTG	732	5	-	Arabidopsis thaliana	cis-acting element involved in the abscisic acid responsiveness
BcMSD1a	evm.model.Scaffold431.23	ABRE	GCCGCGTGGC	1176	9	+	Oryza sativa	cis-acting element involved in the abscisic acid responsiveness
BcMSD1a	evm.model.Scaffold431.23	ABRE	GCAACGTGTC	2787	9	+	Hordeum vulgare	cis-acting element involved in the abscisic acid responsiveness
BcMSD1a	evm.model.Scaffold431.23	ABRE	CACGTG	2789	6	-	Arabidopsis thaliana	cis-acting element involved in the abscisic acid responsiveness
BcMSD1a	evm.model.Scaffold431.23	ABRE	ACGTG	2790	5	+	Arabidopsis thaliana	cis-acting element involved in the abscisic acid responsiveness
BcMSD1a	evm.model.Scaffold431.23	ARE	AAACCA	421	6	+	Zea mays	cis-acting regulatory element essential for the anaerobic induction
BcMSD1a	evm.model.Scaffold431.23	ARE	AAACCA	1763	6	+	Zea mays	cis-acting regulatory element essential for the anaerobic induction
BcMSD1a	evm.model.Scaffold431.23	ARE	AAACCA	1780	6	+	Zea mays	cis-acting regulatory element essential for the anaerobic induction
BcMSD1a	evm.model.Scaffold431.23	ARE	AAACCA	2680	6	-	Zea mays	cis-acting regulatory element essential for the anaerobic induction
BcMSD1a	evm.model.Scaffold431.23	AuxRR-core	GGTCCAT	2236	7	+	Nicotiana tabacum	cis-acting regulatory element involved in auxin responsiveness
BcMSD1a	evm.model.Scaffold431.23	TGA-element	AACGAC	220	6	+	Brassica oleracea	auxin-responsive element
BcMSD1a	evm.model.Scaffold431.23	circadian	CAAAGATATC	1493	9	-	Lycopersicon esculentum	cis-acting regulatory element involved in circadian control
BcMSD1a	evm.model.Scaffold431.23	TC-rich repeats	ATTCTCTAAC	2670	9	-	Nicotiana tabacum	cis-acting element involved in defense and stress responsiveness
BcMSD1a	evm.model.Scaffold431.23	MBS	CAACTG	2118	6	-	Arabidopsis thaliana	MYB binding site involved in drought-inducibility
BcMSD1a	evm.model.Scaffold431.23	CAT-box	GCCACT	608	6	+	Arabidopsis thaliana	cis-acting regulatory element related to meristem expression
BcMSD1a	evm.model.Scaffold431.23	TATC-box	TATCCCA	1508	7	-	Oryza sativa	cis-acting element involved in gibberellin-responsiveness
BcMSD1a	evm.model.Scaffold431.23	Box 4	ATTAAT	1975	6	-	Petroselinum crispum	part of a conserved DNA module involved in light responsiveness
BcMSD1a	evm.model.Scaffold431.23	Box 4	ATTAAT	2249	6	-	Petroselinum crispum	part of a conserved DNA module involved in light responsiveness
BcMSD1a	evm.model.Scaffold431.23	chs-CMA2a	TCACTTGA	1164	8	+	Petroselinum crispum	part of a light responsive element
BcMSD1a	evm.model.Scaffold431.23	GA-motif	ATAGATAA	183	8	-	Arabidopsis thaliana	part of a light responsive element
BcMSD1a	evm.model.Scaffold431.23	GATA-motif	GATAGGA	1511	7	+	Arabidopsis thaliana	part of a light responsive element
BcMSD1a	evm.model.Scaffold431.23	GATA-motif	GATAGGA	1931	7	-	Arabidopsis thaliana	part of a light responsive element
BcMSD1a	evm.model.Scaffold431.23	GATA-motif	GATAGGA	2326	7	+	Arabidopsis thaliana	part of a light responsive element
BcMSD1a	evm.model.Scaffold431.23	G-box	TACGTG	732	6	-	Arabidopsis thaliana	cis-acting regulatory element involved in light responsiveness
BcMSD1a	evm.model.Scaffold431.23	G-box	CACGAC	2178	6	-	Zea mays	cis-acting regulatory element involved in light responsiveness
BcMSD1a	evm.model.Scaffold431.23	G-box	CACGAC	2388	6	+	Zea mays	cis-acting regulatory element involved in light responsiveness
BcMSD1a	evm.model.Scaffold431.23	G-box	ACACGTGGC	2787	9	-	Brassica napus	cis-acting regulatory element involved in light responsiveness
BcMSD1a	evm.model.Scaffold431.23	G-box	CACGTG	2789	6	-	Arabidopsis thaliana	cis-acting regulatory element involved in light responsiveness
BcMSD1a	evm.model.Scaffold431.23	G-Box	CACGTG	2789	6	-	Pisum sativum	cis-acting regulatory element involved in light responsiveness
BcMSD1a	evm.model.Scaffold431.23	GT1-motif	GTGTGTGAA	904	9	+	Solanum tuberosum	light responsive element
BcMSD1a	evm.model.Scaffold431.23	LAMP-element	CTTTATCA	1856	8	+	Pisum sativum	part of a light responsive element
BcMSD1a	evm.model.Scaffold431.23	TCCC-motif	TCTCCCT	2973	7	+	Spinacia oleracea	part of a light responsive element
BcMSD1a	evm.model.Scaffold431.23	LTR	CCGAAA	1741	6	-	Hordeum vulgare	cis-acting element involved in low-temperature responsiveness
BcMSD1a	evm.model.Scaffold431.23	CGTCA-motif	CGTCA	2111	5	-	Hordeum vulgare	cis-acting regulatory element involved in the MeJA-responsiveness
BcMSD1a	evm.model.Scaffold431.23	TGACG-motif	TGACG	2111	5	+	Hordeum vulgare	cis-acting regulatory element involved in the MeJA-responsiveness
BcMSD1a	evm.model.Scaffold431.23	CCAAT-box	CAACGG	511	6	+	Hordeum vulgare	MYBHv1 binding site
BcMSD1a	evm.model.Scaffold431.23	TCA-element	CCATCTTTTT	1418	9	-	Nicotiana tabacum	cis-acting element involved in salicylic acid responsiveness
BcMSD1a	evm.model.Scaffold431.23	TCA-element	CCATCTTTTT	2821	9	+	Nicotiana tabacum	cis-acting element involved in salicylic acid responsiveness
BcMSD1a	evm.model.Scaffold431.23	RY-element	CATGCATG	1298	8	+	Helianthus annuus	cis-acting regulatory element involved in seed-specific regulation
BcMSD1a	evm.model.Scaffold431.23	O2-site	GATGA(C/T)(A/G)TG(A/G)	2305	8	+	Zea mays	cis-acting regulatory element involved in zein metabolism regulation
BcMSD2	evm.model.Scaffold502.2	ABRE	ACGTG	1280	5	-	Arabidopsis thaliana	cis-acting element involved in the abscisic acid responsiveness
BcMSD2	evm.model.Scaffold502.2	ABRE	ACGTG	2049	5	+	Arabidopsis thaliana	cis-acting element involved in the abscisic acid responsiveness
BcMSD2	evm.model.Scaffold502.2	ABRE	ACGTG	2110	5	+	Arabidopsis thaliana	cis-acting element involved in the abscisic acid responsiveness
BcMSD2	evm.model.Scaffold502.2	ARE	AAACCA	653	6	-	Zea mays	cis-acting regulatory element essential for the anaerobic induction
BcMSD2	evm.model.Scaffold502.2	ARE	AAACCA	984	6	-	Zea mays	cis-acting regulatory element essential for the anaerobic induction
BcMSD2	evm.model.Scaffold502.2	ARE	AAACCA	1577	6	+	Zea mays	cis-acting regulatory element essential for the anaerobic induction
BcMSD2	evm.model.Scaffold502.2	ARE	AAACCA	2756	6	+	Zea mays	cis-acting regulatory element essential for the anaerobic induction
BcMSD2	evm.model.Scaffold502.2	MBS	CAACTG	647	6	+	Arabidopsis thaliana	MYB binding site involved in drought-inducibility
BcMSD2	evm.model.Scaffold502.2	MBS	CAACTG	946	6	-	Arabidopsis thaliana	MYB binding site involved in drought-inducibility
BcMSD2	evm.model.Scaffold502.2	MBS	CAACTG	1135	6	+	Arabidopsis thaliana	MYB binding site involved in drought-inducibility
BcMSD2	evm.model.Scaffold502.2	MBS	CAACTG	1189	6	-	Arabidopsis thaliana	MYB binding site involved in drought-inducibility
BcMSD2	evm.model.Scaffold502.2	MBS	CAACTG	1353	6	-	Arabidopsis thaliana	MYB binding site involved in drought-inducibility
BcMSD2	evm.model.Scaffold502.2	MBS	CAACTG	1940	6	-	Arabidopsis thaliana	MYB binding site involved in drought-inducibility
BcMSD2	evm.model.Scaffold502.2	circadian	CAAAGATATC	1631	9	-	Lycopersicon esculentum	cis-acting regulatory element involved in circadian control
BcMSD2	evm.model.Scaffold502.2	P-box	CCTTTTG	163	7	+	Oryza sativa	gibberellin-responsive element
BcMSD2	evm.model.Scaffold502.2	P-box	CCTTTTG	2152	7	-	Oryza sativa	gibberellin-responsive element
BcMSD2	evm.model.Scaffold502.2	TATC-box	TATCCCA	204	7	-	Oryza sativa	cis-acting element involved in gibberellin-responsiveness
BcMSD2	evm.model.Scaffold502.2	TATC-box	TATCCCA	371	7	-	Oryza sativa	cis-acting element involved in gibberellin-responsiveness
BcMSD2	evm.model.Scaffold502.2	AE-box	AGAAACAA	593	8	-	Arabidopsis thaliana	part of a module for light response
BcMSD2	evm.model.Scaffold502.2	ATC-motif	AGTAATCT	1033	8	+	Spinacia oleracea	part of a conserved DNA module involved in light responsiveness
BcMSD2	evm.model.Scaffold502.2	ATCT-motif	AATCTAATCC	676	9	-	Pisum sativum	part of a conserved DNA module involved in light responsiveness
BcMSD2	evm.model.Scaffold502.2	ATCT-motif	AATCTAATCC	2092	9	+	Pisum sativum	part of a conserved DNA module involved in light responsiveness
BcMSD2	evm.model.Scaffold502.2	ATCT-motif	AATCTAATCC	2436	9	-	Pisum sativum	part of a conserved DNA module involved in light responsiveness
BcMSD2	evm.model.Scaffold502.2	Box 4	ATTAAT	706	6	+	Petroselinum crispum	part of a conserved DNA module involved in light responsiveness
BcMSD2	evm.model.Scaffold502.2	Box 4	ATTAAT	887	6	+	Petroselinum crispum	part of a conserved DNA module involved in light responsiveness
BcMSD2	evm.model.Scaffold502.2	Box 4	ATTAAT	2381	6	-	Petroselinum crispum	part of a conserved DNA module involved in light responsiveness
BcMSD2	evm.model.Scaffold502.2	GA-motif	ATAGATAA	2839	8	-	Arabidopsis thaliana	part of a light responsive element
BcMSD2	evm.model.Scaffold502.2	G-Box	CACGTT	1280	6	+	Pisum sativum	cis-acting regulatory element involved in light responsiveness
BcMSD2	evm.model.Scaffold502.2	G-Box	CACGTT	2109	6	-	Pisum sativum	cis-acting regulatory element involved in light responsiveness
BcMSD2	evm.model.Scaffold502.2	G-box	TAAACGTG	1280	8	-	Brassica oleracea	cis-acting regulatory element involved in light responsiveness
BcMSD2	evm.model.Scaffold502.2	G-box	CACGTC	2048	6	-	Zea mays	cis-acting regulatory element involved in light responsiveness
BcMSD2	evm.model.Scaffold502.2	GT1-motif	GGTTAA	2078	6	+	Arabidopsis thaliana	light responsive element
BcMSD2	evm.model.Scaffold502.2	I-box	AAGATAAGGCT	663	10	+	Gossypium hirsutum	part of a light responsive element
BcMSD2	evm.model.Scaffold502.2	I-box	atGATAAGGTC	832	10	+	Helianthus annuus	part of a light responsive element
BcMSD2	evm.model.Scaffold502.2	I-box	AGATAAGG	2837	8	-	Triticum aestivum	part of a light responsive element
BcMSD2	evm.model.Scaffold502.2	MRE	AACCTAA	989	7	-	Petroselinum crispum	MYB binding site involved in light responsiveness
BcMSD2	evm.model.Scaffold502.2	TCT-motif	TCTTAC	642	6	+	Arabidopsis thaliana	part of a light responsive element
BcMSD2	evm.model.Scaffold502.2	TCT-motif	TCTTAC	1548	6	-	Arabidopsis thaliana	part of a light responsive element
BcMSD2	evm.model.Scaffold502.2	LTR	CCGAAA	2728	6	-	Hordeum vulgare	cis-acting element involved in low-temperature responsiveness
BcMSD2	evm.model.Scaffold502.2	LTR	CCGAAA	2945	6	+	Hordeum vulgare	cis-acting element involved in low-temperature responsiveness
BcMSD2	evm.model.Scaffold502.2	CGTCA-motif	CGTCA	89	5	-	Hordeum vulgare	cis-acting regulatory element involved in the MeJA-responsiveness
BcMSD2	evm.model.Scaffold502.2	CGTCA-motif	CGTCA	2047	5	-	Hordeum vulgare	cis-acting regulatory element involved in the MeJA-responsiveness
BcMSD2	evm.model.Scaffold502.2	TGACG-motif	TGACG	89	5	+	Hordeum vulgare	cis-acting regulatory element involved in the MeJA-responsiveness
BcMSD2	evm.model.Scaffold502.2	TGACG-motif	TGACG	2047	5	+	Hordeum vulgare	cis-acting regulatory element involved in the MeJA-responsiveness
BcMSD2	evm.model.Scaffold502.2	TCA-element	TCAGAAGAGG	1400	9	+	Brassica oleracea	cis-acting element involved in salicylic acid responsiveness
BcMSD2	evm.model.Scaffold502.2	TCA-element	CCATCTTTTT	2591	9	-	Nicotiana tabacum	cis-acting element involved in salicylic acid responsiveness
BcMSD2	evm.model.Scaffold502.2	RY-element	CATGCATG	2711	8	-	Helianthus annuus	cis-acting regulatory element involved in seed-specific regulation
BcCSD1c	evm.model.Scaffold52.228	ABRE	ACGTG	832	5	-	Arabidopsis thaliana	cis-acting element involved in the abscisic acid responsiveness
BcCSD1c	evm.model.Scaffold52.228	ARE	AAACCA	935	6	-	Zea mays	cis-acting regulatory element essential for the anaerobic induction
BcCSD1c	evm.model.Scaffold52.228	ARE	AAACCA	2394	6	-	Zea mays	cis-acting regulatory element essential for the anaerobic induction
BcCSD1c	evm.model.Scaffold52.228	ARE	AAACCA	2600	6	-	Zea mays	cis-acting regulatory element essential for the anaerobic induction
BcCSD1c	evm.model.Scaffold52.228	ARE	AAACCA	2781	6	-	Zea mays	cis-acting regulatory element essential for the anaerobic induction
BcCSD1c	evm.model.Scaffold52.228	GC-motif	CCCCCG	1003	6	-	Zea mays	enhancer-like element involved in anoxic specific inducibility
BcCSD1c	evm.model.Scaffold52.228	TGA-box	TGACGTAA	1254	8	-	Glycine max	part of an auxin-responsive element
BcCSD1c	evm.model.Scaffold52.228	circadian	CAAAGATATC	2934	9	+	Lycopersicon esculentum	cis-acting regulatory element involved in circadian control
BcCSD1c	evm.model.Scaffold52.228	MBS	CAACTG	849	6	-	Arabidopsis thaliana	MYB binding site involved in drought-inducibility
BcCSD1c	evm.model.Scaffold52.228	GCN4_motif	TGAGTCA	797	7	-	Oryza sativa	cis-regulatory element involved in endosperm expression
BcCSD1c	evm.model.Scaffold52.228	GCN4_motif	TGAGTCA	1993	7	-	Oryza sativa	cis-regulatory element involved in endosperm expression
BcCSD1c	evm.model.Scaffold52.228	P-box	CCTTTTG	1014	7	+	Oryza sativa	gibberellin-responsive element
BcCSD1c	evm.model.Scaffold52.228	P-box	CCTTTTG	1166	7	-	Oryza sativa	gibberellin-responsive element
BcCSD1c	evm.model.Scaffold52.228	P-box	CCTTTTG	2450	7	+	Oryza sativa	gibberellin-responsive element
BcCSD1c	evm.model.Scaffold52.228	P-box	CCTTTTG	2910	7	+	Oryza sativa	gibberellin-responsive element
BcCSD1c	evm.model.Scaffold52.228	AE-box	AGAAACAA	24	8	+	Arabidopsis thaliana	part of a module for light response
BcCSD1c	evm.model.Scaffold52.228	AE-box	AGAAACTT	1807	8	+	Arabidopsis thaliana	part of a module for light response
BcCSD1c	evm.model.Scaffold52.228	AT1-motif	AATTATTTTTTATT	1510	13	+	Solanum tuberosum	part of a light responsive module
BcCSD1c	evm.model.Scaffold52.228	AT1-motif	AATTATTTTTTATT	1546	13	+	Solanum tuberosum	part of a light responsive module
BcCSD1c	evm.model.Scaffold52.228	ATCT-motif	AATCTAATCC	2214	9	+	Pisum sativum	part of a conserved DNA module involved in light responsiveness
BcCSD1c	evm.model.Scaffold52.228	Box 4	ATTAAT	237	6	+	Petroselinum crispum	part of a conserved DNA module involved in light responsiveness
BcCSD1c	evm.model.Scaffold52.228	Box 4	ATTAAT	310	6	+	Petroselinum crispum	part of a conserved DNA module involved in light responsiveness
BcCSD1c	evm.model.Scaffold52.228	Box 4	ATTAAT	1397	6	+	Petroselinum crispum	part of a conserved DNA module involved in light responsiveness
BcCSD1c	evm.model.Scaffold52.228	Box 4	ATTAAT	1454	6	+	Petroselinum crispum	part of a conserved DNA module involved in light responsiveness
BcCSD1c	evm.model.Scaffold52.228	Box 4	ATTAAT	1547	6	-	Petroselinum crispum	part of a conserved DNA module involved in light responsiveness
BcCSD1c	evm.model.Scaffold52.228	Box 4	ATTAAT	2738	6	-	Petroselinum crispum	part of a conserved DNA module involved in light responsiveness
BcCSD1c	evm.model.Scaffold52.228	Box 4	ATTAAT	2919	6	-	Petroselinum crispum	part of a conserved DNA module involved in light responsiveness
BcCSD1c	evm.model.Scaffold52.228	chs-CMA1a	TTACTTAA	2518	8	-	Daucus carota	part of a light responsive element
BcCSD1c	evm.model.Scaffold52.228	GA-motif	ATAGATAA	1281	8	-	Arabidopsis thaliana	part of a light responsive element
BcCSD1c	evm.model.Scaffold52.228	Gap-box	CAAATGAA(A/G)A	1212	9.5	-	Arabidopsis thaliana	part of a light responsive element
BcCSD1c	evm.model.Scaffold52.228	GATA-motif	AAGATAAGATT	2145	10	-	Arabidopsis thaliana	part of a light responsive element
BcCSD1c	evm.model.Scaffold52.228	G-Box	CACGTT	832	6	+	Pisum sativum	cis-acting regulatory element involved in light responsiveness
BcCSD1c	evm.model.Scaffold52.228	GT1-motif	GGTTAAT	409	7	-	Avena sativa	light responsive element
BcCSD1c	evm.model.Scaffold52.228	GT1-motif	GGTTAA	410	6	-	Arabidopsis thaliana	light responsive element
BcCSD1c	evm.model.Scaffold52.228	GT1-motif	GGTTAA	2434	6	+	Arabidopsis thaliana	light responsive element
BcCSD1c	evm.model.Scaffold52.228	GT1-motif	GGTTAAT	2594	7	+	Avena sativa	light responsive element
BcCSD1c	evm.model.Scaffold52.228	I-box	TAGATAACC	1279	9	-	Pisum sativum	part of a light responsive element
BcCSD1c	evm.model.Scaffold52.228	I-box	GTATAAGGCC	2623	9	+	Larix laricina	part of a light responsive element
BcCSD1c	evm.model.Scaffold52.228	I-box	cGATAAGGCG	2883	9	-	Zea mays	part of a light responsive element
BcCSD1c	evm.model.Scaffold52.228	MRE	AACCTAA	2950	7	-	Petroselinum crispum	MYB binding site involved in light responsiveness
BcCSD1c	evm.model.Scaffold52.228	TCT-motif	TCTTAC	1033	6	+	Arabidopsis thaliana	part of a light responsive element
BcCSD1c	evm.model.Scaffold52.228	LTR	CCGAAA	304	6	+	Hordeum vulgare	cis-acting element involved in low-temperature responsiveness
BcCSD1c	evm.model.Scaffold52.228	CGTCA-motif	CGTCA	1257	5	+	Hordeum vulgare	cis-acting regulatory element involved in the MeJA-responsiveness
BcCSD1c	evm.model.Scaffold52.228	TGACG-motif	TGACG	1257	5	-	Hordeum vulgare	cis-acting regulatory element involved in the MeJA-responsiveness
BcCSD1c	evm.model.Scaffold52.228	CAT-box	GCCACT	868	6	-	Arabidopsis thaliana	cis-acting regulatory element related to meristem expression
BcCSD1c	evm.model.Scaffold52.228	TCA-element	CCATCTTTTT	1826	9	+	Nicotiana tabacum	cis-acting element involved in salicylic acid responsiveness
BcCSD1c	evm.model.Scaffold52.228	CCAAT-box	CAACGG	565	6	+	Hordeum vulgare	MYBHv1 binding site
BcFSD1	evm.model.Scaffold63.64	ABRE	ACGTG	2159	5	-	Arabidopsis thaliana	cis-acting element involved in the abscisic acid responsiveness
BcFSD1	evm.model.Scaffold63.64	ABRE	ACGTG	2847	5	+	Arabidopsis thaliana	cis-acting element involved in the abscisic acid responsiveness
BcFSD1	evm.model.Scaffold63.64	ARE	AAACCA	488	6	-	Zea mays	cis-acting regulatory element essential for the anaerobic induction
BcFSD1	evm.model.Scaffold63.64	ARE	AAACCA	871	6	-	Zea mays	cis-acting regulatory element essential for the anaerobic induction
BcFSD1	evm.model.Scaffold63.64	TGA-element	AACGAC	2331	6	-	Brassica oleracea	auxin-responsive element
BcFSD1	evm.model.Scaffold63.64	circadian	CAAAGATATC	2980	9	+	Lycopersicon esculentum	cis-acting regulatory element involved in circadian control
BcFSD1	evm.model.Scaffold63.64	P-box	CCTTTTG	563	7	-	Oryza sativa	gibberellin-responsive element
BcFSD1	evm.model.Scaffold63.64	AE-box	AGAAACAA	1547	8	+	Arabidopsis thaliana	part of a module for light response
BcFSD1	evm.model.Scaffold63.64	Box 4	ATTAAT	2213	6	-	Petroselinum crispum	part of a conserved DNA module involved in light responsiveness
BcFSD1	evm.model.Scaffold63.64	Box 4	ATTAAT	2262	6	-	Petroselinum crispum	part of a conserved DNA module involved in light responsiveness
BcFSD1	evm.model.Scaffold63.64	Box 4	ATTAAT	2297	6	-	Petroselinum crispum	part of a conserved DNA module involved in light responsiveness
BcFSD1	evm.model.Scaffold63.64	Box 4	ATTAAT	2322	6	-	Petroselinum crispum	part of a conserved DNA module involved in light responsiveness
BcFSD1	evm.model.Scaffold63.64	Box 4	ATTAAT	2600	6	-	Petroselinum crispum	part of a conserved DNA module involved in light responsiveness
BcFSD1	evm.model.Scaffold63.64	GATA-motif	GATAGGG	741	7	-	Pisum sativum	part of a light responsive element
BcFSD1	evm.model.Scaffold63.64	G-box	TACGTG	2159	6	-	Arabidopsis thaliana	cis-acting regulatory element involved in light responsiveness
BcFSD1	evm.model.Scaffold63.64	G-box	CACGTC	2846	6	-	Zea mays	cis-acting regulatory element involved in light responsiveness
BcFSD1	evm.model.Scaffold63.64	GT1-motif	GGTTAAT	657	7	-	Avena sativa	light responsive element
BcFSD1	evm.model.Scaffold63.64	GT1-motif	GGTTAA	658	6	-	Arabidopsis thaliana	light responsive element
BcFSD1	evm.model.Scaffold63.64	GT1-motif	GGTTAA	1932	6	+	Arabidopsis thaliana	light responsive element
BcFSD1	evm.model.Scaffold63.64	GT1-motif	GGTTAAT	2803	7	+	Avena sativa	light responsive element
BcFSD1	evm.model.Scaffold63.64	I-box	AGATAAGG	67	8	+	Triticum aestivum	part of a light responsive element
BcFSD1	evm.model.Scaffold63.64	I-box	cCATATCCAAT	1273	10	+	Flaveria trinervia	part of a light responsive element
BcFSD1	evm.model.Scaffold63.64	TCT-motif	TCTTAC	2509	6	+	Arabidopsis thaliana	part of a light responsive element
BcFSD1	evm.model.Scaffold63.64	LTR	CCGAAA	2986	6	-	Hordeum vulgare	cis-acting element involved in low-temperature responsiveness
BcFSD1	evm.model.Scaffold63.64	CGTCA-motif	CGTCA	2845	5	-	Hordeum vulgare	cis-acting regulatory element involved in the MeJA-responsiveness
BcFSD1	evm.model.Scaffold63.64	TGACG-motif	TGACG	2845	5	+	Hordeum vulgare	cis-acting regulatory element involved in the MeJA-responsiveness
BcFSD1	evm.model.Scaffold63.64	CAT-box	GCCACT	589	6	-	Arabidopsis thaliana	cis-acting regulatory element related to meristem expression
BcFSD1	evm.model.Scaffold63.64	CAT-box	GCCACT	2855	6	+	Arabidopsis thaliana	cis-acting regulatory element related to meristem expression
BcFSD1	evm.model.Scaffold63.64	O2-site	GATGATGTGG	2876	9	+	Zea mays	cis-acting regulatory element involved in zein metabolism regulation
BcFSD2	evm.model.Scaffold65.429	ARE	AAACCA	2348	6	+	Zea mays	cis-acting regulatory element essential for the anaerobic induction
BcFSD2	evm.model.Scaffold65.429	TGA-element	AACGAC	1307	6	-	Brassica oleracea	auxin-responsive element
BcFSD2	evm.model.Scaffold65.429	MBS	CAACTG	107	6	+	Arabidopsis thaliana	MYB binding site involved in drought-inducibility
BcFSD2	evm.model.Scaffold65.429	GCN4_motif	TGAGTCA	2522	7	-	Oryza sativa	cis-regulatory element involved in endosperm expression
BcFSD2	evm.model.Scaffold65.429	P-box	CCTTTTG	84	7	-	Oryza sativa	gibberellin-responsive element
BcFSD2	evm.model.Scaffold65.429	P-box	CCTTTTG	1038	7	+	Oryza sativa	gibberellin-responsive element
BcFSD2	evm.model.Scaffold65.429	P-box	CCTTTTG	2962	7	+	Oryza sativa	gibberellin-responsive element
BcFSD2	evm.model.Scaffold65.429	AT1-motif	AATTATTTTTTATT	981	13	+	Solanum tuberosum	part of a light responsive module
BcFSD2	evm.model.Scaffold65.429	Box 4	ATTAAT	1471	6	+	Petroselinum crispum	part of a conserved DNA module involved in light responsiveness
BcFSD2	evm.model.Scaffold65.429	Box 4	ATTAAT	1500	6	+	Petroselinum crispum	part of a conserved DNA module involved in light responsiveness
BcFSD2	evm.model.Scaffold65.429	Box 4	ATTAAT	1522	6	-	Petroselinum crispum	part of a conserved DNA module involved in light responsiveness
BcFSD2	evm.model.Scaffold65.429	Box 4	ATTAAT	1967	6	-	Petroselinum crispum	part of a conserved DNA module involved in light responsiveness
BcFSD2	evm.model.Scaffold65.429	Box 4	ATTAAT	2256	6	-	Petroselinum crispum	part of a conserved DNA module involved in light responsiveness
BcFSD2	evm.model.Scaffold65.429	Box 4	ATTAAT	2269	6	-	Petroselinum crispum	part of a conserved DNA module involved in light responsiveness
BcFSD2	evm.model.Scaffold65.429	GATA-motif	AAGGATAAGG	716	9	+	Solanum tuberosum	part of a light responsive element
BcFSD2	evm.model.Scaffold65.429	GATA-motif	AAGATAAGATT	2427	10	-	Arabidopsis thaliana	part of a light responsive element
BcFSD2	evm.model.Scaffold65.429	G-box	CACGAC	1403	6	+	Zea mays	cis-acting regulatory element involved in light responsiveness
BcFSD2	evm.model.Scaffold65.429	G-box	CACGAC	2246	6	-	Zea mays	cis-acting regulatory element involved in light responsiveness
BcFSD2	evm.model.Scaffold65.429	LAMP-element	CTTTATCA	320	8	-	Pisum sativum	part of a light responsive element
BcFSD2	evm.model.Scaffold65.429	LAMP-element	CTTTATCA	667	8	-	Pisum sativum	part of a light responsive element
BcFSD2	evm.model.Scaffold65.429	Sp1	GGGCGG	177	6	+	Oryza sativa	light responsive element
BcFSD2	evm.model.Scaffold65.429	TCCC-motif	TCTCCCT	1122	7	+	Spinacia oleracea	part of a light responsive element
BcFSD2	evm.model.Scaffold65.429	TCCC-motif	TCTCCCT	1128	7	+	Spinacia oleracea	part of a light responsive element
BcFSD2	evm.model.Scaffold65.429	TCCC-motif	TCTCCCT	1134	7	+	Spinacia oleracea	part of a light responsive element
BcFSD2	evm.model.Scaffold65.429	TCCC-motif	TCTCCCT	1140	7	+	Spinacia oleracea	part of a light responsive element
BcFSD2	evm.model.Scaffold65.429	TCCC-motif	TCTCCCT	2332	7	+	Spinacia oleracea	part of a light responsive element
BcFSD2	evm.model.Scaffold65.429	CGTCA-motif	CGTCA	583	5	+	Hordeum vulgare	cis-acting regulatory element involved in the MeJA-responsiveness
BcFSD2	evm.model.Scaffold65.429	CGTCA-motif	CGTCA	2339	5	-	Hordeum vulgare	cis-acting regulatory element involved in the MeJA-responsiveness
BcFSD2	evm.model.Scaffold65.429	TGACG-motif	TGACG	583	5	-	Hordeum vulgare	cis-acting regulatory element involved in the MeJA-responsiveness
BcFSD2	evm.model.Scaffold65.429	TGACG-motif	TGACG	2339	5	+	Hordeum vulgare	cis-acting regulatory element involved in the MeJA-responsiveness
BcFSD2	evm.model.Scaffold65.429	CAT-box	GCCACT	268	6	+	Arabidopsis thaliana	cis-acting regulatory element related to meristem expression
BcFSD2	evm.model.Scaffold65.429	CAT-box	GCCACT	1849	6	+	Arabidopsis thaliana	cis-acting regulatory element related to meristem expression
BcCSDc	evm.model.Scaffold89.460	ARE	AAACCA	284	6	+	Zea mays	cis-acting regulatory element essential for the anaerobic induction
BcCSDc	evm.model.Scaffold89.460	ARE	AAACCA	408	6	-	Zea mays	cis-acting regulatory element essential for the anaerobic induction
BcCSDc	evm.model.Scaffold89.460	ARE	AAACCA	1810	6	-	Zea mays	cis-acting regulatory element essential for the anaerobic induction
BcCSDc	evm.model.Scaffold89.460	ARE	AAACCA	2657	6	+	Zea mays	cis-acting regulatory element essential for the anaerobic induction
BcCSDc	evm.model.Scaffold89.460	Box 4	ATTAAT	440	6	+	Petroselinum crispum	part of a conserved DNA module involved in light responsiveness
BcCSDc	evm.model.Scaffold89.460	Box 4	ATTAAT	498	6	+	Petroselinum crispum	part of a conserved DNA module involved in light responsiveness
BcCSDc	evm.model.Scaffold89.460	Box 4	ATTAAT	502	6	+	Petroselinum crispum	part of a conserved DNA module involved in light responsiveness
BcCSDc	evm.model.Scaffold89.460	Box 4	ATTAAT	568	6	+	Petroselinum crispum	part of a conserved DNA module involved in light responsiveness
BcCSDc	evm.model.Scaffold89.460	Box 4	ATTAAT	794	6	+	Petroselinum crispum	part of a conserved DNA module involved in light responsiveness
BcCSDc	evm.model.Scaffold89.460	Box 4	ATTAAT	1538	6	-	Petroselinum crispum	part of a conserved DNA module involved in light responsiveness
BcCSDc	evm.model.Scaffold89.460	Box 4	ATTAAT	1950	6	-	Petroselinum crispum	part of a conserved DNA module involved in light responsiveness
BcCSDc	evm.model.Scaffold89.460	Box 4	ATTAAT	2323	6	-	Petroselinum crispum	part of a conserved DNA module involved in light responsiveness
BcCSDc	evm.model.Scaffold89.460	Box 4	ATTAAT	2332	6	-	Petroselinum crispum	part of a conserved DNA module involved in light responsiveness
BcCSDc	evm.model.Scaffold89.460	Box 4	ATTAAT	2457	6	-	Petroselinum crispum	part of a conserved DNA module involved in light responsiveness
BcCSDc	evm.model.Scaffold89.460	Box 4	ATTAAT	2472	6	-	Petroselinum crispum	part of a conserved DNA module involved in light responsiveness
BcCSDc	evm.model.Scaffold89.460	Box 4	ATTAAT	2614	6	-	Petroselinum crispum	part of a conserved DNA module involved in light responsiveness
BcCSDc	evm.model.Scaffold89.460	Box II	TGGTAATAA	1530	9	-	Solanum tuberosum	part of a light responsive element
BcCSDc	evm.model.Scaffold89.460	GA-motif	ATAGATAA	918	8	-	Arabidopsis thaliana	part of a light responsive element
BcCSDc	evm.model.Scaffold89.460	GA-motif	ATAGATAA	1968	8	-	Arabidopsis thaliana	part of a light responsive element
BcCSDc	evm.model.Scaffold89.460	GT1-motif	GGTTAA	2424	6	-	Arabidopsis thaliana	light responsive element
BcCSDc	evm.model.Scaffold89.460	I-box	gGATAAGGTG	238	9	-	Zea mays	part of a light responsive element
BcCSDc	evm.model.Scaffold89.460	MRE	AACCTAA	1135	7	-	Petroselinum crispum	MYB binding site involved in light responsiveness
BcCSDc	evm.model.Scaffold89.460	MRE	AACCTAA	1978	7	-	Petroselinum crispum	MYB binding site involved in light responsiveness
BcCSDc	evm.model.Scaffold89.460	MRE	AACCTAA	2426	7	+	Petroselinum crispum	MYB binding site involved in light responsiveness
BcCSDc	evm.model.Scaffold89.460	CGTCA-motif	CGTCA	2756	5	-	Hordeum vulgare	cis-acting regulatory element involved in the MeJA-responsiveness
BcCSDc	evm.model.Scaffold89.460	TGACG-motif	TGACG	2756	5	+	Hordeum vulgare	cis-acting regulatory element involved in the MeJA-responsiveness
BcFSD3	evm.model.Scaffold967.1	ARE	AAACCA	2093	6	+	Zea mays	cis-acting regulatory element essential for the anaerobic induction
BcFSD3	evm.model.Scaffold967.1	GC-motif	CCCCCG	1045	6	+	Zea mays	enhancer-like element involved in anoxic specific inducibility
BcFSD3	evm.model.Scaffold967.1	TGA-element	AACGAC	1059	6	-	Brassica oleracea	auxin-responsive element
BcFSD3	evm.model.Scaffold967.1	GCN4_motif	TGAGTCA	2268	7	-	Oryza sativa	cis-regulatory element involved in endosperm expression
BcFSD3	evm.model.Scaffold967.1	P-box	CCTTTTG	793	7	+	Oryza sativa	gibberellin-responsive element
BcFSD3	evm.model.Scaffold967.1	P-box	CCTTTTG	2717	7	+	Oryza sativa	gibberellin-responsive element
BcFSD3	evm.model.Scaffold967.1	AT1-motif	AATTATTTTTTATT	736	13	+	Solanum tuberosum	part of a light responsive module
BcFSD3	evm.model.Scaffold967.1	Box 4	ATTAAT	1223	6	+	Petroselinum crispum	part of a conserved DNA module involved in light responsiveness
BcFSD3	evm.model.Scaffold967.1	Box 4	ATTAAT	1252	6	+	Petroselinum crispum	part of a conserved DNA module involved in light responsiveness
BcFSD3	evm.model.Scaffold967.1	Box 4	ATTAAT	1274	6	+	Petroselinum crispum	part of a conserved DNA module involved in light responsiveness
BcFSD3	evm.model.Scaffold967.1	Box 4	ATTAAT	1716	6	-	Petroselinum crispum	part of a conserved DNA module involved in light responsiveness
BcFSD3	evm.model.Scaffold967.1	Box 4	ATTAAT	2018	6	-	Petroselinum crispum	part of a conserved DNA module involved in light responsiveness
BcFSD3	evm.model.Scaffold967.1	GATA-motif	AAGGATAAGG	471	9	+	Solanum tuberosum	part of a light responsive element
BcFSD3	evm.model.Scaffold967.1	G-box	CACGAC	1155	6	+	Zea mays	cis-acting regulatory element involved in light responsiveness
BcFSD3	evm.model.Scaffold967.1	G-box	CACGAC	1995	6	-	Zea mays	cis-acting regulatory element involved in light responsiveness
BcFSD3	evm.model.Scaffold967.1	LAMP-element	CTTTATCA	75	8	-	Pisum sativum	part of a light responsive element
BcFSD3	evm.model.Scaffold967.1	LAMP-element	CTTTATCA	422	8	-	Pisum sativum	part of a light responsive element
BcFSD3	evm.model.Scaffold967.1	TCCC-motif	TCTCCCT	877	7	+	Spinacia oleracea	part of a light responsive element
BcFSD3	evm.model.Scaffold967.1	TCCC-motif	TCTCCCT	883	7	+	Spinacia oleracea	part of a light responsive element
BcFSD3	evm.model.Scaffold967.1	TCCC-motif	TCTCCCT	889	7	+	Spinacia oleracea	part of a light responsive element
BcFSD3	evm.model.Scaffold967.1	TCCC-motif	TCTCCCT	895	7	+	Spinacia oleracea	part of a light responsive element
BcFSD3	evm.model.Scaffold967.1	TCCC-motif	TCTCCCT	2077	7	+	Spinacia oleracea	part of a light responsive element
BcFSD3	evm.model.Scaffold967.1	TCCC-motif	TCTCCCT	2806	7	+	Spinacia oleracea	part of a light responsive element
BcFSD3	evm.model.Scaffold967.1	CGTCA-motif	CGTCA	338	5	+	Hordeum vulgare	cis-acting regulatory element involved in the MeJA-responsiveness
BcFSD3	evm.model.Scaffold967.1	CGTCA-motif	CGTCA	2084	5	-	Hordeum vulgare	cis-acting regulatory element involved in the MeJA-responsiveness
BcFSD3	evm.model.Scaffold967.1	TGACG-motif	TGACG	338	5	-	Hordeum vulgare	cis-acting regulatory element involved in the MeJA-responsiveness
BcFSD3	evm.model.Scaffold967.1	TGACG-motif	TGACG	2084	5	+	Hordeum vulgare	cis-acting regulatory element involved in the MeJA-responsiveness
BcFSD3	evm.model.Scaffold967.1	CAT-box	GCCACT	23	6	+	Arabidopsis thaliana	cis-acting regulatory element related to meristem expression
BcFSD3	evm.model.Scaffold967.1	TCA-element	CCATCTTTTT	2139	9	+	Nicotiana tabacum	cis-acting element involved in salicylic acid responsiveness
BcFSD3	evm.model.Scaffold967.1	TCA-element	CCATCTTTTT	2864	9	+	Nicotiana tabacum	cis-acting element involved in salicylic acid responsiveness
